# Supplementary material for: What Did They Mean by That? Young Adults' Interpretations of 105 Common Emojis
Source: Front Psychol. 2021 May 31;12:655297. doi: 10.3389/fpsyg.2021.655297 (PMC8200631; doi:10.3389/fpsyg.2021.655297)
Supplement: Supplementary file 1 [file Data_Sheet_1.CSV]

Subject	Age	Sex	Texting.RESP	Texting1.RESP	Emoji	emoji.RESP	emotion.RESP
12494	21	male	3	2	freezing-face_1f976.png	icy	4
12494	21	male	3	2	speech-balloon_1f4ac.png	talking	3
12494	21	male	3	2	face-with-pleading-eyes_1f97a.png	sad	2
12494	21	male	3	2	grinning-face-with-star-eyes_1f929.png	happy	4
12494	21	male	3	2	persevering-face_1f623.png		2
12494	21	male	3	2	white-frowning-face_2639.png	sad	1
12494	21	male	3	2	worried-face_1f61f.png	desperate	1
12494	21	male	3	2	two-hearts_1f495.png	lovers	4
12494	21	male	3	2	anguished-face_1f627.png	Suprised	3
12494	21	male	3	2	thumbs-up-sign_emoji-modifier-fitzpatrick-type-3_1f44d-1f3fc_1f3fc.png	Sounds good	3
12494	21	male	3	2	lying-face_1f925.png	Clown	2
12494	21	male	3	2	face-with-party-horn-and-party-hat_1f973.png	Birthday	3
12494	21	male	3	2	unamused-face_1f612.png		3
12494	21	male	3	2	disappointed-face_1f61e.png	Disappointed	2
12494	21	male	3	2	left-facing-fist_1f91b.png		4
12494	21	male	3	2	smiling-face-with-smiling-eyes_1f60a.png	Happy	5
12494	21	male	3	2	smiling-face-with-heart-shaped-eyes_1f60d.png	Love	4
12494	21	male	3	2	face-without-mouth_1f636.png	Innocent	3
12494	21	male	3	2	face-with-one-eyebrow-raised_1f928.png		3
12494	21	male	3	2	smiling-face-with-smiling-eyes_1f60a.png	Happy	4
12494	21	male	3	2	face-throwing-a-kiss_1f618.png	Kisses	5
12494	21	male	3	2	face-with-stuck-out-tongue_1f61b.png	Flirting	4
12494	21	male	3	2	neutral-face_1f610.png	Neutral	3
12494	21	male	3	2	imp_1f47f.png	Devil	2
12494	21	male	3	2	face-with-cold-sweat_1f613.png	Sweating	2
12494	21	male	3	2	smiling-face-with-halo_1f607.png	Angel	4
12494	21	male	3	2	ok-hand-sign_1f44c.png	Okay	4
12494	21	male	3	2	slightly-smiling-face_1f642.png	Happy	4
12494	21	male	3	2	smiling-face-with-open-mouth-and-smiling-eyes_1f604.png	Happier	5
12494	21	male	3	2	nauseated-face_1f922.png	V omit	2
12494	21	male	3	2	kissing-face-with-closed-eyes_1f61a.png	Kiss	4
12494	21	male	3	2	rolling-on-the-floor-laughing_1f923.png	LMAO	4
12494	21	male	3	2	grimacing-face_1f62c.png	Nervous	2
12494	21	male	3	2	nerd-face_1f913.png	Nerdy	3
12494	21	male	3	2	zipper-mouth-face_1f910.png	Quiet	3
12494	21	male	3	2	crying-face_1f622.png	Crying	2
12494	21	male	3	2	confounded-face_1f616.png	Upset	1
12494	21	male	3	2	face-with-finger-covering-closed-lips_1f92b.png	Shhh	3
12494	21	male	3	2	person-raising-both-hands-in-celebration_1f64c.png	P raise	4
12494	21	male	3	2	confused-face_1f615.png	Really	2
12494	21	male	3	2	loudly-crying-face_1f62d.png	Crying laughing	4
12494	21	male	3	2	astonished-face_1f632.png	S uprised	4
12494	21	male	3	2	overheated-face_1f975.png	Hot	3
12494	21	male	3	2	weary-face_1f629.png	Disappointment	2
12494	21	male	3	2	tired-face_1f62b.png	Devastated	1
12494	21	male	3	2	face-with-look-of-triumph_1f624.png	Mad	3
12494	21	male	3	2	smiling-face-with-smiling-eyes-and-three-hearts_1f970.png	Lover	5
12494	21	male	3	2	smirking-face_1f60f.png	Smirk	5
12494	21	male	3	2	relieved-face_1f60c.png	Calm	5
12494	21	male	3	2	smiling-face-with-open-mouth_1f603.png	Happy	5
12494	21	male	3	2	face-with-open-mouth-vomiting_1f92e (1).png	Vomit	2
12494	21	male	3	2	drooling-face_1f924.png	Drool	4
12494	21	male	3	2	person-with-folded-hands_1f64f.png	Pray	5
12494	21	male	3	2	expressionless-face_1f611.png	smh	2
12494	21	male	3	2	grinning-face-with-one-large-and-one-small-eye_1f92a.png	Crazy	4
12494	21	male	3	2	fearful-face_1f628.png	Yikes	3
12494	21	male	3	2	victory-hand_270c.png	peace	3
12494	21	male	3	2	face-with-stuck-out-tongue-and-tightly-closed-eyes_1f61d.png	Flitatious	4
12494	21	male	3	2	face-with-open-mouth_1f62e.png	Suprised	3
12494	21	male	3	2	flushed-face_1f633.png	Blushing	4
12494	21	male	3	2	money-mouth-face_1f911.png	MONEYBAG s	5
12494	21	male	3	2	face-savouring-delicious-food_1f60b.png	yum	4
12494	21	male	3	2	flexed-biceps_1f4aa.png	Buff	5
12494	21	male	3	2	heavy-black-heart_2764.png	Heart	4
12494	21	male	3	2	face-with-head-bandage_1f915.png	Hurt	2
12494	21	male	3	2	face-with-open-mouth-and-cold-sweat_1f630.png	Cold	2
12494	21	male	3	2	kissing-face_1f617.png	Kisses	4
12494	21	male	3	2	pile-of-poo_1f4a9.png	Turd	2
12494	21	male	3	2	upside-down-face_1f643.png	Really	1
12494	21	male	3	2	smiling-face-with-smiling-eyes-and-hand-covering-mouth_1f92d.png	Yawn	3
12494	21	male	3	2	ghost_1f47b.png	Ghost	5
12494	21	male	3	2	angry-face_1f620.png	A ngry	2
12494	21	male	3	2	smiling-face-with-sunglasses_1f60e.png	Cool	5
12494	21	male	3	2	white-smiling-face_263a.png	Delighted	5
12494	21	male	3	2	sleepy-face_1f62a.png	Sick	2
12494	21	male	3	2	face-with-thermometer_1f912.png	Sicker	2
12494	21	male	3	2	pensive-face_1f614.png	Disappointed	2
12494	21	male	3	2	face-with-tears-of-joy_1f602.png	L MAO	5
12494	21	male	3	2	disappointed-but-relieved-face_1f625.png	Sad	2
12494	21	male	3	2	hushed-face_1f62f.png	suprise	3
12494	21	male	3	2	face-screaming-in-fear_1f631.png	wtf	3
12494	21	male	3	2	shocked-face-with-exploding-head_1f92f.png	Mind blown	3
12494	21	male	3	2	hugging-face_1f917.png	Hug	5
12494	21	male	3	2	face-with-open-mouth-vomiting_1f92e.png	Vomit	2
12494	21	male	3	2	thumbs-down-sign_emoji-modifier-fitzpatrick-type-5_1f44e-1f3fe_1f3fe.png	Dont like	2
12494	21	male	3	2	serious-face-with-symbols-covering-mouth_1f92c.png	Mad	2
12494	21	male	3	2	face-with-rolling-eyes_1f644.png	Whatever	2
12494	21	male	3	2	dizzy-face_1f635.png	Dead	2
12494	21	male	3	2	grinning-face_1f600.png	Haha	4
12494	21	male	3	2	pouting-face_1f621.png	Mad	2
12494	21	male	3	2	smiling-face-with-open-mouth-and-tightly-closed-eyes_1f606.png	Laughing	4
12494	21	male	3	2	grinning-face-with-smiling-eyes_1f601.png	Smile	4
12494	21	male	3	2	thinking-face_1f914.png	Thinking	3
12494	21	male	3	2	face-with-uneven-eyes-and-wavy-mouth_1f974.png	COnfused	2
12494	21	male	3	2	face-with-monocle_1f9d0.png	Examining	3
12494	21	male	3	2	kissing-face-with-smiling-eyes_1f619.png	Kisses	5
12494	21	male	3	2	sneezing-face_1f927.png	Tissue	3
12494	21	male	3	2	winking-face_1f609.png	Wink	4
12494	21	male	3	2	frowning-face-with-open-mouth_1f626.png	d isappointed suprise	2
12494	21	male	3	2	face-with-cowboy-hat_1f920.png	Cowboy	4
12494	21	male	3	2	smiling-face-with-open-mouth-and-cold-sweat_1f605.png	Nervous	2
12494	21	male	3	2	face-with-stuck-out-tongue-and-tightly-closed-eyes_1f61d (1).png	FLirt	4
12494	21	male	3	2	slightly-frowning-face_1f641.png	Sad	1
12494	21	male	3	2	yawning-face_1f971.png	Tired	3
12494	21	male	3	2	sleeping-face_1f634.png	Sleepy	3
12494	21	male	3	2	clown-face_1f921.png	Clown	2
12494	21	male	3	2	smiling-face-with-halo_1f607.png	Angel	5
12494	21	male	3	2	smiling-face-with-smiling-eyes-and-three-hearts_1f970.png	Lovely	4
12747	21	male	1	2	relieved-face_1f60c.png	calm	4
12747	21	male	1	2	face-with-stuck-out-tongue_1f61b.png	silly	4
12747	21	male	1	2	sleeping-face_1f634.png	sleep	5
12747	21	male	1	2	rolling-on-the-floor-laughing_1f923.png	hilarious	5
12747	21	male	1	2	face-with-monocle_1f9d0.png		4
12747	21	male	1	2	face-with-look-of-triumph_1f624.png	steaming mad	2
12747	21	male	1	2	smiling-face-with-open-mouth_1f603.png	happy	5
12747	21	male	1	2	face-throwing-a-kiss_1f618.png	kissy lovey dovey	5
12747	21	male	1	2	face-with-stuck-out-tongue-and-tightly-closed-eyes_1f61d (1).png	goofy silly	5
12747	21	male	1	2	smiling-face-with-smiling-eyes_1f60a.png	glad	4
12747	21	male	1	2	flexed-biceps_1f4aa.png	strong confident	5
12747	21	male	1	2	money-mouth-face_1f911.png	money greedy	2
12747	21	male	1	2	smiling-face-with-halo_1f607.png	perfect goody two shoes	3
12747	21	male	1	2	sleepy-face_1f62a.png	bored	3
12747	21	male	1	2	face-with-party-horn-and-party-hat_1f973.png	party fun	4
12747	21	male	1	2	pile-of-poo_1f4a9.png	poop	5
12747	21	male	1	2	persevering-face_1f623.png	frustrated headache	3
12747	21	male	1	2	angry-face_1f620.png	mad angry	2
12747	21	male	1	2	tired-face_1f62b.png	moan sex	4
12747	21	male	1	2	freezing-face_1f976.png	chill freezing	1
12747	21	male	1	2	confounded-face_1f616.png	confused in pain	1
12747	21	male	1	2	dizzy-face_1f635.png	dead shocked	3
12747	21	male	1	2	face-with-open-mouth-vomiting_1f92e (1).png	gross disgusting vomit	2
12747	21	male	1	2	astonished-face_1f632.png	shocked wow	3
12747	21	male	1	2	unamused-face_1f612.png	sassy sarcastic irritated whatever	2
12747	21	male	1	2	face-with-cold-sweat_1f613.png	stressed frustrated	2
12747	21	male	1	2	anguished-face_1f627.png	shocked forgetful oh no	1
12747	21	male	1	2	grinning-face-with-one-large-and-one-small-eye_1f92a.png	goofy fun silly	4
12747	21	male	1	2	face-screaming-in-fear_1f631.png	scared terrified	1
12747	21	male	1	2	person-with-folded-hands_1f64f.png	prayer high five amen	4
12747	21	male	1	2	confused-face_1f615.png	smug whatever not satisfied	2
12747	21	male	1	2	face-savouring-delicious-food_1f60b.png	yummy tasty food	4
12747	21	male	1	2	grinning-face-with-star-eyes_1f929.png	rock star amazed wow	5
12747	21	male	1	2	victory-hand_270c.png	Peace out Bye Later	5
12747	21	male	1	2	face-with-open-mouth-and-cold-sweat_1f630.png	stressed scared	1
12747	21	male	1	2	ghost_1f47b.png	ghost boo snapchat	3
12747	21	male	1	2	drooling-face_1f924.png	drooling goofy himbo	3
12747	21	male	1	2	pensive-face_1f614.png	sad	2
12747	21	male	1	2	fearful-face_1f628.png	shocked scared	2
12747	21	male	1	2	face-with-stuck-out-tongue-and-tightly-closed-eyes_1f61d.png	goofy glad	4
12747	21	male	1	2	nauseated-face_1f922.png	about to throw up gross ew	2
12747	21	male	1	2	slightly-frowning-face_1f641.png	sad not satisfied	2
12747	21	male	1	2	left-facing-fist_1f91b.png	bump it hit the rock yea man	5
12747	21	male	1	2	smiling-face-with-open-mouth-and-smiling-eyes_1f604.png	happy glad	5
12747	21	male	1	2	thumbs-up-sign_emoji-modifier-fitzpatrick-type-3_1f44d-1f3fc_1f3fc.png	sounds good cool good	5
12747	21	male	1	2	lying-face_1f925.png	confounded	2
12747	21	male	1	2	overheated-face_1f975.png	sweaty hot and gross	1
12747	21	male	1	2	smiling-face-with-smiling-eyes_1f60a.png	happy	4
12747	21	male	1	2	face-without-mouth_1f636.png	deer in the headlights scared surprised	3
12747	21	male	1	2	yawning-face_1f971.png	bored sleepy yawn	3
12747	21	male	1	2	face-with-uneven-eyes-and-wavy-mouth_1f974.png	silly fun joking	5
12747	21	male	1	2	two-hearts_1f495.png	love hearts	5
12747	21	male	1	2	person-raising-both-hands-in-celebration_1f64c.png	praise amen	4
12747	21	male	1	2	smiling-face-with-smiling-eyes-and-three-hearts_1f970.png	in love	5
12747	21	male	1	2	kissing-face-with-closed-eyes_1f61a.png	kissy	5
12747	21	male	1	2	ok-hand-sign_1f44c.png	okay	3
12747	21	male	1	2	shocked-face-with-exploding-head_1f92f.png	mind blown	4
12747	21	male	1	2	winking-face_1f609.png	flirty goofy silly	5
12747	21	male	1	2	pouting-face_1f621.png	mad	1
12747	21	male	1	2	kissing-face_1f617.png	weird creepy	1
12747	21	male	1	2	loudly-crying-face_1f62d.png	crying but not explicitly sad	3
12747	21	male	1	2	crying-face_1f622.png	sad	2
12747	21	male	1	2	face-with-open-mouth-vomiting_1f92e.png	gross disgusting barf	1
12747	21	male	1	2	neutral-face_1f610.png	nothing	3
12747	21	male	1	2	kissing-face-with-smiling-eyes_1f619.png	kissy	3
12747	21	male	1	2	smiling-face-with-sunglasses_1f60e.png	cool	5
12747	21	male	1	2	grinning-face_1f600.png	glad	4
12747	21	male	1	2	face-with-cowboy-hat_1f920.png	yeehaw cowboy	3
12747	21	male	1	2	white-smiling-face_263a.png	calm satisfied	4
12747	21	male	1	2	face-with-thermometer_1f912.png	sick fever corona	3
12747	21	male	1	2	thinking-face_1f914.png	questioning thinking meme	3
12747	21	male	1	2	speech-balloon_1f4ac.png	typing stressed anticipatory	2
12747	21	male	1	2	slightly-smiling-face_1f642.png	happy	4
12747	21	male	1	2	frowning-face-with-open-mouth_1f626.png	scared afraid oh no	2
12747	21	male	1	2	weary-face_1f629.png	moan sex sexting	4
12747	21	male	1	2	hugging-face_1f917.png	jazz hands	5
12747	21	male	1	2	sneezing-face_1f927.png	sneezing sick cold	2
12747	21	male	1	2	face-with-one-eyebrow-raised_1f928.png	questioning confused	3
12747	21	male	1	2	disappointed-but-relieved-face_1f625.png	sad	3
12747	21	male	1	2	flushed-face_1f633.png	really shocked surprised embarassed	3
12747	21	male	1	2	hushed-face_1f62f.png	oh	2
12747	21	male	1	2	face-with-rolling-eyes_1f644.png	whatever	2
12747	21	male	1	2	smiling-face-with-open-mouth-and-tightly-closed-eyes_1f606.png	laughing happy	3
12747	21	male	1	2	smirking-face_1f60f.png	sly clever flirty	3
12747	21	male	1	2	face-with-pleading-eyes_1f97a.png	doe eyed cute flirty adorable	5
12747	21	male	1	2	heavy-black-heart_2764.png	heart love	5
12747	21	male	1	2	worried-face_1f61f.png	sad	4
12747	21	male	1	2	expressionless-face_1f611.png	annoyed	2
12747	21	male	1	2	grinning-face-with-smiling-eyes_1f601.png	glad	4
12747	21	male	1	2	white-frowning-face_2639.png	sad	1
12747	21	male	1	2	clown-face_1f921.png	clown goofing embarassed	2
12747	21	male	1	2	face-with-tears-of-joy_1f602.png	laughing	5
12747	21	male	1	2	disappointed-face_1f61e.png	really sad disappointed	5
12747	21	male	1	2	face-with-open-mouth_1f62e.png	shocked wow	3
12747	21	male	1	2	serious-face-with-symbols-covering-mouth_1f92c.png	swearing wtf	3
12747	21	male	1	2	smiling-face-with-open-mouth-and-cold-sweat_1f605.png	relieved	4
12747	21	male	1	2	zipper-mouth-face_1f910.png	silent purposefully being quiet	3
12747	21	male	1	2	smiling-face-with-smiling-eyes-and-hand-covering-mouth_1f92d.png	shocked surprised	3
12747	21	male	1	2	imp_1f47f.png	mischievious sad misbehaving	3
12747	21	male	1	2	smiling-face-with-smiling-eyes-and-three-hearts_1f970.png	in love happy	5
12747	21	male	1	2	smiling-face-with-heart-shaped-eyes_1f60d.png	puppy love in awe in love	5
12747	21	male	1	2	thumbs-down-sign_emoji-modifier-fitzpatrick-type-5_1f44e-1f3fe_1f3fe.png	boo	1
12747	21	male	1	2	face-with-finger-covering-closed-lips_1f92b.png	shhhh secret	3
12747	21	male	1	2	face-with-head-bandage_1f915.png	injured ouch	4
12747	21	male	1	2	smiling-face-with-halo_1f607.png	angel goody two shoes	2
12747	21	male	1	2	grimacing-face_1f62c.png	afraid embarassed skiddish not sure	2
12747	21	male	1	2	nerd-face_1f913.png	goofy nerdy myself	3
12747	21	male	1	2	upside-down-face_1f643.png	whatever not happy about something but it s not a huge deal	2
14206	21	female	1	2	disappointed-face_1f61e.png	dissapointed	2
14206	21	female	1	2	face-with-pleading-eyes_1f97a.png	adorable	3
14206	21	female	1	2	smiling-face-with-halo_1f607.png		5
14206	21	female	1	2	face-with-stuck-out-tongue-and-tightly-closed-eyes_1f61d.png	funny	4
14206	21	female	1	2	pensive-face_1f614.png	disappointed	2
14206	21	female	1	2	confounded-face_1f616.png	cringy	1
14206	21	female	1	2	victory-hand_270c.png	peace	4
14206	21	female	1	2	heavy-black-heart_2764.png	love	5
14206	21	female	1	2	relieved-face_1f60c.png	content	3
14206	21	female	1	2	thumbs-up-sign_emoji-modifier-fitzpatrick-type-3_1f44d-1f3fc_1f3fc.png	thumbs up	5
14206	21	female	1	2	face-with-stuck-out-tongue-and-tightly-closed-eyes_1f61d (1).png	silly	4
14206	21	female	1	2	kissing-face-with-smiling-eyes_1f619.png	kissy face	4
14206	21	female	1	2	face-with-cowboy-hat_1f920.png	cowboy	4
14206	21	female	1	2	face-screaming-in-fear_1f631.png	shocked	1
14206	21	female	1	2	worried-face_1f61f.png	taken back	2
14206	21	female	1	2	smiling-face-with-smiling-eyes-and-three-hearts_1f970.png	in love	5
14206	21	female	1	2	sleepy-face_1f62a.png	upset	2
14206	21	female	1	2	thumbs-down-sign_emoji-modifier-fitzpatrick-type-5_1f44e-1f3fe_1f3fe.png	thumbs down	2
14206	21	female	1	2	face-without-mouth_1f636.png	no comment	2
14206	21	female	1	2	face-with-cold-sweat_1f613.png	worried	2
14206	21	female	1	2	smiling-face-with-open-mouth-and-tightly-closed-eyes_1f606.png	excited	5
14206	21	female	1	2	upside-down-face_1f643.png	unsure about something	2
14206	21	female	1	2	freezing-face_1f976.png	cold	1
14206	21	female	1	2	clown-face_1f921.png	clown	1
14206	21	female	1	2	ghost_1f47b.png	ghost	3
14206	21	female	1	2	lying-face_1f925.png	a liar	2
14206	21	female	1	2	crying-face_1f622.png	upset	2
14206	21	female	1	2	weary-face_1f629.png	disappointed	2
14206	21	female	1	2	smiling-face-with-smiling-eyes-and-three-hearts_1f970.png	in love	5
14206	21	female	1	2	kissing-face_1f617.png	kissy face	4
14206	21	female	1	2	smiling-face-with-open-mouth_1f603.png	happy	5
14206	21	female	1	2	white-frowning-face_2639.png	sad	2
14206	21	female	1	2	unamused-face_1f612.png	annoyed	1
14206	21	female	1	2	face-with-open-mouth-and-cold-sweat_1f630.png	worried	1
14206	21	female	1	2	smiling-face-with-smiling-eyes_1f60a.png	cheerful	4
14206	21	female	1	2	face-with-head-bandage_1f915.png	not feeling good	2
14206	21	female	1	2	face-throwing-a-kiss_1f618.png	flirty face	5
14206	21	female	1	2	sneezing-face_1f927.png	sick	2
14206	21	female	1	2	zipper-mouth-face_1f910.png	no comment	1
14206	21	female	1	2	face-with-uneven-eyes-and-wavy-mouth_1f974.png	drunk	3
14206	21	female	1	2	dizzy-face_1f635.png	shocked	2
14206	21	female	1	2	winking-face_1f609.png	winking flirt face	4
14206	21	female	1	2	grinning-face-with-smiling-eyes_1f601.png	super happy	4
14206	21	female	1	2	drooling-face_1f924.png	something looks yummy	4
14206	21	female	1	2	nauseated-face_1f922.png	disgusted	2
14206	21	female	1	2	flexed-biceps_1f4aa.png	strong	3
14206	21	female	1	2	frowning-face-with-open-mouth_1f626.png	taken back	3
14206	21	female	1	2	face-with-finger-covering-closed-lips_1f92b.png	something is a seceret	3
14206	21	female	1	2	ok-hand-sign_1f44c.png	perfect	4
14206	21	female	1	2	expressionless-face_1f611.png	annoye	2
14206	21	female	1	2	nerd-face_1f913.png	nerdy	4
14206	21	female	1	2	smiling-face-with-open-mouth-and-cold-sweat_1f605.png	stressed	2
14206	21	female	1	2	yawning-face_1f971.png	bored	1
14206	21	female	1	2	smiling-face-with-heart-shaped-eyes_1f60d.png	heart eyes	5
14206	21	female	1	2	face-with-look-of-triumph_1f624.png	mad	1
14206	21	female	1	2	two-hearts_1f495.png	love	4
14206	21	female	1	2	rolling-on-the-floor-laughing_1f923.png	laughing really hard	4
14206	21	female	1	2	face-with-open-mouth-vomiting_1f92e.png	sooo disgusted	1
14206	21	female	1	2	shocked-face-with-exploding-head_1f92f.png	mind blown	4
14206	21	female	1	2	speech-balloon_1f4ac.png	typing	3
14206	21	female	1	2	astonished-face_1f632.png	shocked	3
14206	21	female	1	2	white-smiling-face_263a.png	cheery	4
14206	21	female	1	2	confused-face_1f615.png	upset	2
14206	21	female	1	2	grinning-face-with-one-large-and-one-small-eye_1f92a.png	goofy	4
14206	21	female	1	2	face-with-thermometer_1f912.png	sick	2
14206	21	female	1	2	face-with-open-mouth_1f62e.png	shocked	2
14206	21	female	1	2	loudly-crying-face_1f62d.png	disappointed	2
14206	21	female	1	2	face-with-rolling-eyes_1f644.png	annoyed	1
14206	21	female	1	2	disappointed-but-relieved-face_1f625.png	stressed	2
14206	21	female	1	2	smirking-face_1f60f.png	smirky face	4
14206	21	female	1	2	smiling-face-with-smiling-eyes-and-hand-covering-mouth_1f92d.png	taken back	2
14206	21	female	1	2	overheated-face_1f975.png	really hot	3
14206	21	female	1	2	pile-of-poo_1f4a9.png	shit	1
14206	21	female	1	2	slightly-frowning-face_1f641.png	upset	2
14206	21	female	1	2	smiling-face-with-smiling-eyes_1f60a.png	cheerful	4
14206	21	female	1	2	left-facing-fist_1f91b.png	fist bump	4
14206	21	female	1	2	grimacing-face_1f62c.png	oops	2
14206	21	female	1	2	flushed-face_1f633.png	embarassed	1
14206	21	female	1	2	fearful-face_1f628.png	embarrased	1
14206	21	female	1	2	angry-face_1f620.png	angry	1
14206	21	female	1	2	face-with-stuck-out-tongue_1f61b.png	silly	4
14206	21	female	1	2	person-with-folded-hands_1f64f.png	prayer hands thankful	5
14206	21	female	1	2	face-with-one-eyebrow-raised_1f928.png	annoyed	2
14206	21	female	1	2	face-with-party-horn-and-party-hat_1f973.png	celebration	5
14206	21	female	1	2	anguished-face_1f627.png	shocked	2
14206	21	female	1	2	face-with-monocle_1f9d0.png	investigative	3
14206	21	female	1	2	persevering-face_1f623.png	upset	2
14206	21	female	1	2	pouting-face_1f621.png	angry	1
14206	21	female	1	2	grinning-face_1f600.png	generally happy	4
14206	21	female	1	2	tired-face_1f62b.png	dissapointed	2
14206	21	female	1	2	smiling-face-with-sunglasses_1f60e.png	cool	3
14206	21	female	1	2	imp_1f47f.png	making bad decision	3
14206	21	female	1	2	neutral-face_1f610.png	no comment	3
14206	21	female	1	2	smiling-face-with-open-mouth-and-smiling-eyes_1f604.png	happy	4
14206	21	female	1	2	slightly-smiling-face_1f642.png	happy	4
14206	21	female	1	2	hugging-face_1f917.png	happy for someone else	5
14206	21	female	1	2	face-savouring-delicious-food_1f60b.png	joyful	4
14206	21	female	1	2	smiling-face-with-halo_1f607.png	perfect	5
14206	21	female	1	2	thinking-face_1f914.png	curious	2
14206	21	female	1	2	person-raising-both-hands-in-celebration_1f64c.png	thankful	5
14206	21	female	1	2	face-with-tears-of-joy_1f602.png	laughing hard	5
14206	21	female	1	2	serious-face-with-symbols-covering-mouth_1f92c.png	really upset	1
14206	21	female	1	2	kissing-face-with-closed-eyes_1f61a.png	kissy face	5
14206	21	female	1	2	money-mouth-face_1f911.png	successful	5
14206	21	female	1	2	face-with-open-mouth-vomiting_1f92e (1).png	disgusted	2
14206	21	female	1	2	grinning-face-with-star-eyes_1f929.png	amazing	5
14206	21	female	1	2	hushed-face_1f62f.png	taken bakc	2
14206	21	female	1	2	sleeping-face_1f634.png	sleepy	3
14962	18	male	1	2	expressionless-face_1f611.png	Skeptical	2
14962	18	male	1	2	serious-face-with-symbols-covering-mouth_1f92c.png	Furious	1
14962	18	male	1	2	face-with-uneven-eyes-and-wavy-mouth_1f974.png	Tipsy	2
14962	18	male	1	2	dizzy-face_1f635.png	Shell shocked	2
14962	18	male	1	2	face-with-one-eyebrow-raised_1f928.png	Doubtful	2
14962	18	male	1	2	anguished-face_1f627.png	Shaken	2
14962	18	male	1	2	face-with-look-of-triumph_1f624.png	Very Frustrated	1
14962	18	male	1	2	smiling-face-with-smiling-eyes-and-hand-covering-mouth_1f92d.png	Oops	2
14962	18	male	1	2	worried-face_1f61f.png	Mortified	1
14962	18	male	1	2	smiling-face-with-open-mouth_1f603.png	Really happy	5
14962	18	male	1	2	face-with-stuck-out-tongue-and-tightly-closed-eyes_1f61d.png	Yuck	3
14962	18	male	1	2	crying-face_1f622.png	Sad	2
14962	18	male	1	2	grinning-face-with-smiling-eyes_1f601.png	Proud	5
14962	18	male	1	2	zipper-mouth-face_1f910.png	Lips are sealed	3
14962	18	male	1	2	sneezing-face_1f927.png	Sick	2
14962	18	male	1	2	heavy-black-heart_2764.png	Love	5
14962	18	male	1	2	kissing-face_1f617.png	Nervous	3
14962	18	male	1	2	smiling-face-with-halo_1f607.png	Pure	5
14962	18	male	1	2	clown-face_1f921.png	Clown	2
14962	18	male	1	2	person-with-folded-hands_1f64f.png	Praise	5
14962	18	male	1	2	smiling-face-with-smiling-eyes_1f60a.png	Feeling very good	5
14962	18	male	1	2	face-with-cold-sweat_1f613.png	Really nervous	1
14962	18	male	1	2	nauseated-face_1f922.png	Nauseous	1
14962	18	male	1	2	victory-hand_270c.png	Peace	4
14962	18	male	1	2	ghost_1f47b.png	Spooky	3
14962	18	male	1	2	face-with-open-mouth-vomiting_1f92e (1).png	Very ill	1
14962	18	male	1	2	overheated-face_1f975.png	Exhausted	2
14962	18	male	1	2	disappointed-face_1f61e.png	Worn out	1
14962	18	male	1	2	sleeping-face_1f634.png	Sleep	3
14962	18	male	1	2	person-raising-both-hands-in-celebration_1f64c.png	Praise	5
14962	18	male	1	2	thinking-face_1f914.png	Perplexed	3
14962	18	male	1	2	upside-down-face_1f643.png	Joking messing around	5
14962	18	male	1	2	face-with-party-horn-and-party-hat_1f973.png	Congratulations	5
14962	18	male	1	2	persevering-face_1f623.png	Pain	2
14962	18	male	1	2	smiling-face-with-open-mouth-and-tightly-closed-eyes_1f606.png	Ecstatic	5
14962	18	male	1	2	kissing-face-with-smiling-eyes_1f619.png	Kiss	4
14962	18	male	1	2	smiling-face-with-open-mouth-and-smiling-eyes_1f604.png	Very happy	5
14962	18	male	1	2	smiling-face-with-smiling-eyes_1f60a.png	Comforted and feeling good	5
14962	18	male	1	2	face-savouring-delicious-food_1f60b.png	Hungry	5
14962	18	male	1	2	pile-of-poo_1f4a9.png	Poop	3
14962	18	male	1	2	face-screaming-in-fear_1f631.png	Shocked	2
14962	18	male	1	2	pensive-face_1f614.png	Tired worn out	2
14962	18	male	1	2	face-with-stuck-out-tongue_1f61b.png	Goofy	4
14962	18	male	1	2	weary-face_1f629.png	Really exhausted	1
14962	18	male	1	2	lying-face_1f925.png	Liar	2
14962	18	male	1	2	money-mouth-face_1f911.png	Money	4
14962	18	male	1	2	speech-balloon_1f4ac.png	Message	3
14962	18	male	1	2	smiling-face-with-smiling-eyes-and-three-hearts_1f970.png	Love	5
14962	18	male	1	2	thumbs-up-sign_emoji-modifier-fitzpatrick-type-3_1f44d-1f3fc_1f3fc.png	Good job	4
14962	18	male	1	2	unamused-face_1f612.png	Envious disgust	2
14962	18	male	1	2	hushed-face_1f62f.png	Oh	2
14962	18	male	1	2	grimacing-face_1f62c.png	Yikes nervous	2
14962	18	male	1	2	smiling-face-with-smiling-eyes-and-three-hearts_1f970.png	Deep love	5
14962	18	male	1	2	grinning-face-with-star-eyes_1f929.png	Wow	5
14962	18	male	1	2	winking-face_1f609.png	Wink	4
14962	18	male	1	2	face-with-finger-covering-closed-lips_1f92b.png	Shhh	4
14962	18	male	1	2	smiling-face-with-halo_1f607.png	Pure	5
14962	18	male	1	2	face-with-thermometer_1f912.png	Sick	2
14962	18	male	1	2	two-hearts_1f495.png	Sending love	5
14962	18	male	1	2	drooling-face_1f924.png	Really hungry	5
14962	18	male	1	2	pouting-face_1f621.png	Really angry	1
14962	18	male	1	2	face-with-tears-of-joy_1f602.png	Laughing hard	5
14962	18	male	1	2	shocked-face-with-exploding-head_1f92f.png	Mond blown	3
14962	18	male	1	2	relieved-face_1f60c.png	Pleased	4
14962	18	male	1	2	face-with-cowboy-hat_1f920.png	Yeehaw	5
14962	18	male	1	2	white-smiling-face_263a.png	Happiness	5
14962	18	male	1	2	face-with-open-mouth-vomiting_1f92e.png	Really sick	1
14962	18	male	1	2	sleepy-face_1f62a.png	Sleepy	3
14962	18	male	1	2	confused-face_1f615.png	Shucks	2
14962	18	male	1	2	neutral-face_1f610.png	Meh	3
14962	18	male	1	2	face-without-mouth_1f636.png	Uh oh	3
14962	18	male	1	2	frowning-face-with-open-mouth_1f626.png	Oh gosh	2
14962	18	male	1	2	smiling-face-with-heart-shaped-eyes_1f60d.png	Love	5
14962	18	male	1	2	face-with-head-bandage_1f915.png	Hurt	2
14962	18	male	1	2	nerd-face_1f913.png	Nerd	3
14962	18	male	1	2	face-with-rolling-eyes_1f644.png	Oh well	2
14962	18	male	1	2	rolling-on-the-floor-laughing_1f923.png	Laughing really hard	5
14962	18	male	1	2	confounded-face_1f616.png	Really nervous	1
14962	18	male	1	2	astonished-face_1f632.png	Oh	3
14962	18	male	1	2	tired-face_1f62b.png	Really exhausted	1
14962	18	male	1	2	imp_1f47f.png	Evil	1
14962	18	male	1	2	face-with-open-mouth-and-cold-sweat_1f630.png	Mortified	1
14962	18	male	1	2	left-facing-fist_1f91b.png	Fist bump	4
14962	18	male	1	2	face-with-monocle_1f9d0.png	Doubtful	3
14962	18	male	1	2	fearful-face_1f628.png	Shell shocked	2
14962	18	male	1	2	face-with-stuck-out-tongue-and-tightly-closed-eyes_1f61d (1).png	Yuck	3
14962	18	male	1	2	hugging-face_1f917.png	Proud	5
14962	18	male	1	2	face-with-pleading-eyes_1f97a.png	Sad hurt	2
14962	18	male	1	2	thumbs-down-sign_emoji-modifier-fitzpatrick-type-5_1f44e-1f3fe_1f3fe.png	Don t approve	2
14962	18	male	1	2	face-throwing-a-kiss_1f618.png	Blow a kiss	5
14962	18	male	1	2	smiling-face-with-open-mouth-and-cold-sweat_1f605.png	Embarrased	2
14962	18	male	1	2	face-with-open-mouth_1f62e.png	Surprised	3
14962	18	male	1	2	angry-face_1f620.png	Angry	2
14962	18	male	1	2	smirking-face_1f60f.png	wink wink nudge nudge	4
14962	18	male	1	2	kissing-face-with-closed-eyes_1f61a.png	Kiss	5
14962	18	male	1	2	freezing-face_1f976.png	Freezing	2
14962	18	male	1	2	grinning-face-with-one-large-and-one-small-eye_1f92a.png	Crazy	5
14962	18	male	1	2	smiling-face-with-sunglasses_1f60e.png	Cool	5
14962	18	male	1	2	disappointed-but-relieved-face_1f625.png	Sad	2
14962	18	male	1	2	ok-hand-sign_1f44c.png	Excellent	5
14962	18	male	1	2	yawning-face_1f971.png	Tired	3
14962	18	male	1	2	grinning-face_1f600.png	Happy	4
14962	18	male	1	2	flushed-face_1f633.png	Really embarrased	2
14962	18	male	1	2	slightly-frowning-face_1f641.png	Sad	2
14962	18	male	1	2	flexed-biceps_1f4aa.png	Strong	4
14962	18	male	1	2	slightly-smiling-face_1f642.png	Happy inside	4
14962	18	male	1	2	loudly-crying-face_1f62d.png	Crying hard	1
14962	18	male	1	2	white-frowning-face_2639.png	Very sad unfortunate	2
14962	18	male	1	2	face-with-head-bandage_1f915.png	Injured	2
14962	18	male	1	2	frowning-face-with-open-mouth_1f626.png	Surprised negative	2
14962	18	male	1	2	shocked-face-with-exploding-head_1f92f.png	Mind Blown	3
14962	18	male	1	2	face-with-cold-sweat_1f613.png	Dreadful	1
14962	18	male	1	2	grinning-face-with-smiling-eyes_1f601.png	Proud	4
14962	18	male	1	2	face-with-stuck-out-tongue-and-tightly-closed-eyes_1f61d (1).png	Yuck	3
14962	18	male	1	2	ghost_1f47b.png	Spooky	3
14962	18	male	1	2	pile-of-poo_1f4a9.png	Poop	3
14962	18	male	1	2	ok-hand-sign_1f44c.png	Excellent	5
14962	18	male	1	2	money-mouth-face_1f911.png	Money	4
14962	18	male	1	2	face-with-party-horn-and-party-hat_1f973.png	Congratulations	5
14962	18	male	1	2	disappointed-face_1f61e.png	Tired and worn out	2
14962	18	male	1	2	expressionless-face_1f611.png	Doubtful	2
14962	18	male	1	2	slightly-smiling-face_1f642.png	Pleased	4
14962	18	male	1	2	smiling-face-with-smiling-eyes-and-three-hearts_1f970.png	Deep love	5
14962	18	male	1	2	flushed-face_1f633.png	Mortified	1
14962	18	male	1	2	rolling-on-the-floor-laughing_1f923.png	Laughing hysterically	5
14962	18	male	1	2	face-with-open-mouth-vomiting_1f92e.png	Really sick	1
14962	18	male	1	2	face-savouring-delicious-food_1f60b.png	Hungry	5
14962	18	male	1	2	angry-face_1f620.png	Upset and angry	2
14962	18	male	1	2	left-facing-fist_1f91b.png	Fist bump	4
14962	18	male	1	2	face-with-pleading-eyes_1f97a.png	Sorrow and sadness	2
14962	18	male	1	2	neutral-face_1f610.png	Meh	3
14962	18	male	1	2	smiling-face-with-open-mouth-and-smiling-eyes_1f604.png	Really happy	5
14962	18	male	1	2	thinking-face_1f914.png	Doubtful deep in thought	3
14962	18	male	1	2	kissing-face-with-closed-eyes_1f61a.png	Kiss	5
14962	18	male	1	2	speech-balloon_1f4ac.png	Text	3
14962	18	male	1	2	victory-hand_270c.png	Peace	4
14962	18	male	1	2	pensive-face_1f614.png	Tired exhausted	2
14962	18	male	1	2	face-with-uneven-eyes-and-wavy-mouth_1f974.png	Tipsy	2
14962	18	male	1	2	overheated-face_1f975.png	Really exhausted and overheated	2
14962	18	male	1	2	face-with-open-mouth-and-cold-sweat_1f630.png	Fearful	2
14962	18	male	1	2	smiling-face-with-halo_1f607.png	Pure	5
14962	18	male	1	2	white-frowning-face_2639.png	Pretty sad	2
14962	18	male	1	2	unamused-face_1f612.png	Reluctant	2
14962	18	male	1	2	hushed-face_1f62f.png	Surprised	3
14962	18	male	1	2	smiling-face-with-open-mouth_1f603.png	Very happy	5
14962	18	male	1	2	tired-face_1f62b.png	Really worn out and tired	1
14962	18	male	1	2	smirking-face_1f60f.png	wink wink nudge nudge	4
14962	18	male	1	2	kissing-face_1f617.png	Surprised	3
14962	18	male	1	2	serious-face-with-symbols-covering-mouth_1f92c.png	Furious	1
14962	18	male	1	2	nauseated-face_1f922.png	Nauseous	2
14962	18	male	1	2	face-screaming-in-fear_1f631.png	Mortified	1
14962	18	male	1	2	hugging-face_1f917.png	Proud	5
14962	18	male	1	2	anguished-face_1f627.png	Shocked	2
14962	18	male	1	2	weary-face_1f629.png	Exhausted	2
14962	18	male	1	2	pouting-face_1f621.png	Very angry	1
14962	18	male	1	2	dizzy-face_1f635.png	Really surprised taken back	2
14962	18	male	1	2	crying-face_1f622.png	Sad	2
14962	18	male	1	2	freezing-face_1f976.png	Freezing	3
14962	18	male	1	2	upside-down-face_1f643.png	Messing around playful	4
14962	18	male	1	2	face-with-stuck-out-tongue_1f61b.png	Goofy	4
14962	18	male	1	2	face-with-one-eyebrow-raised_1f928.png	Skeptical	3
14962	18	male	1	2	face-with-look-of-triumph_1f624.png	Enough Getting frustrated	2
14962	18	male	1	2	loudly-crying-face_1f62d.png	Really sad	1
14962	18	male	1	2	slightly-frowning-face_1f641.png	Sad unfortunate	2
14962	18	male	1	2	sneezing-face_1f927.png	Sneeze sick	2
14962	18	male	1	2	winking-face_1f609.png	Wink	4
14962	18	male	1	2	face-with-stuck-out-tongue-and-tightly-closed-eyes_1f61d.png	Yuck	3
14962	18	male	1	2	smiling-face-with-smiling-eyes-and-hand-covering-mouth_1f92d.png	Oops	3
14962	18	male	1	2	drooling-face_1f924.png	Mouth watering	4
14962	18	male	1	2	yawning-face_1f971.png	Tired	3
14962	18	male	1	2	clown-face_1f921.png	Clown	2
14962	18	male	1	2	lying-face_1f925.png	Liar	2
14962	18	male	1	2	confounded-face_1f616.png	Really nervous	2
14962	18	male	1	2	relieved-face_1f60c.png	Pleased content	4
14962	18	male	1	2	white-smiling-face_263a.png	Feeling good	5
14962	18	male	1	2	thumbs-up-sign_emoji-modifier-fitzpatrick-type-3_1f44d-1f3fc_1f3fc.png	Good job	4
14962	18	male	1	2	disappointed-but-relieved-face_1f625.png	Scared	2
14962	18	male	1	2	zipper-mouth-face_1f910.png	Lips are sealed	3
14962	18	male	1	2	face-with-thermometer_1f912.png	Not feeling well	2
14962	18	male	1	2	face-with-open-mouth_1f62e.png	Shocked	3
14962	18	male	1	2	nerd-face_1f913.png	Nerd	3
14962	18	male	1	2	persevering-face_1f623.png	Disgust nervous	2
14962	18	male	1	2	smiling-face-with-heart-shaped-eyes_1f60d.png	Love	5
14962	18	male	1	2	thumbs-down-sign_emoji-modifier-fitzpatrick-type-5_1f44e-1f3fe_1f3fe.png	Not great	2
14962	18	male	1	2	person-with-folded-hands_1f64f.png	Praise	5
14962	18	male	1	2	grimacing-face_1f62c.png	Eeek Yikes	2
14962	18	male	1	2	smiling-face-with-smiling-eyes-and-three-hearts_1f970.png	Deep love	5
14962	18	male	1	2	grinning-face-with-star-eyes_1f929.png	Wow	5
14962	18	male	1	2	face-with-cowboy-hat_1f920.png	Cowboy	4
14962	18	male	1	2	kissing-face-with-smiling-eyes_1f619.png	Kiss	5
14962	18	male	1	2	heavy-black-heart_2764.png	Love	5
14962	18	male	1	2	face-throwing-a-kiss_1f618.png	Blow a kiss	5
14962	18	male	1	2	fearful-face_1f628.png	Mortified and terrified	1
14962	18	male	1	2	face-with-open-mouth-vomiting_1f92e (1).png	Really sick	1
14962	18	male	1	2	smiling-face-with-halo_1f607.png	Pure	5
14962	18	male	1	2	confused-face_1f615.png	Meh	3
14962	18	male	1	2	smiling-face-with-open-mouth-and-tightly-closed-eyes_1f606.png	Ecstatic	5
14962	18	male	1	2	two-hearts_1f495.png	Love	5
14962	18	male	1	2	face-with-rolling-eyes_1f644.png	Whatever	2
14962	18	male	1	2	face-without-mouth_1f636.png	Uh oh	3
14962	18	male	1	2	face-with-monocle_1f9d0.png	Skeptical	3
14962	18	male	1	2	astonished-face_1f632.png	Oh	3
14962	18	male	1	2	grinning-face-with-one-large-and-one-small-eye_1f92a.png	Crazy	4
14962	18	male	1	2	smiling-face-with-smiling-eyes_1f60a.png	Very happy pleased	5
14962	18	male	1	2	smiling-face-with-open-mouth-and-cold-sweat_1f605.png	Embarrased	4
14962	18	male	1	2	sleepy-face_1f62a.png	Sleepy	3
14962	18	male	1	2	flexed-biceps_1f4aa.png	Strong	4
14962	18	male	1	2	face-with-tears-of-joy_1f602.png	Laughing hard	4
14962	18	male	1	2	person-raising-both-hands-in-celebration_1f64c.png	Praise	5
14962	18	male	1	2	smiling-face-with-smiling-eyes_1f60a.png	Very happy and feeling good	5
14962	18	male	1	2	sleeping-face_1f634.png	Sleepy	3
14962	18	male	1	2	face-with-finger-covering-closed-lips_1f92b.png	Shhh	3
14962	18	male	1	2	imp_1f47f.png	Very upset	2
14962	18	male	1	2	worried-face_1f61f.png	Pretty nervous	2
14962	18	male	1	2	smiling-face-with-sunglasses_1f60e.png	Cool	5
14962	18	male	1	2	grinning-face_1f600.png	Happy	4
15421	17	female	3	2	nauseated-face_1f922.png	barf	3
15421	17	female	3	2	grinning-face-with-smiling-eyes_1f601.png	happy	2
15421	17	female	3	2	angry-face_1f620.png	angry	1
15421	17	female	3	2	crying-face_1f622.png		2
15421	17	female	3	2	astonished-face_1f632.png	shocked	4
15421	17	female	3	2	winking-face_1f609.png	okayyyy	4
15421	17	female	3	2	face-with-uneven-eyes-and-wavy-mouth_1f974.png	yikes	3
15421	17	female	3	2	smiling-face-with-smiling-eyes-and-three-hearts_1f970.png	much love	4
15421	17	female	3	2	disappointed-face_1f61e.png	depressing	1
15421	17	female	3	2	smiling-face-with-sunglasses_1f60e.png	cool	4
15421	17	female	3	2	kissing-face_1f617.png	oop	3
15421	17	female	3	2	face-with-cold-sweat_1f613.png	sad oop	2
15421	17	female	3	2	nerd-face_1f913.png	geeked	3
15421	17	female	3	2	left-facing-fist_1f91b.png	bro	3
15421	17	female	3	2	face-savouring-delicious-food_1f60b.png	yum	3
15421	17	female	3	2	dizzy-face_1f635.png	dead	2
15421	17	female	3	2	drooling-face_1f924.png	damn	4
15421	17	female	3	2	confused-face_1f615.png	darn	4
15421	17	female	3	2	weary-face_1f629.png	emotional	3
15421	17	female	3	2	face-with-open-mouth_1f62e.png	suprised	3
15421	17	female	3	2	face-with-one-eyebrow-raised_1f928.png	huh	3
15421	17	female	3	2	victory-hand_270c.png	peace	3
15421	17	female	3	2	flushed-face_1f633.png	oop	3
15421	17	female	3	2	face-with-cowboy-hat_1f920.png	yeehaw	4
15421	17	female	3	2	serious-face-with-symbols-covering-mouth_1f92c.png	anger	1
15421	17	female	3	2	two-hearts_1f495.png	love	4
15421	17	female	3	2	face-with-open-mouth-vomiting_1f92e.png	vomit	3
15421	17	female	3	2	face-with-stuck-out-tongue-and-tightly-closed-eyes_1f61d.png	crazy	3
15421	17	female	3	2	smiling-face-with-smiling-eyes-and-hand-covering-mouth_1f92d.png	shocked oop	3
15421	17	female	3	2	smiling-face-with-open-mouth_1f603.png	so happy im crazy	4
15421	17	female	3	2	face-with-look-of-triumph_1f624.png	heated	2
15421	17	female	3	2	smiling-face-with-open-mouth-and-smiling-eyes_1f604.png	joy	5
15421	17	female	3	2	smirking-face_1f60f.png	smirk	3
15421	17	female	3	2	face-with-tears-of-joy_1f602.png	only use ironically	3
15421	17	female	3	2	face-screaming-in-fear_1f631.png	really shocked	3
15421	17	female	3	2	loudly-crying-face_1f62d.png	crying laughing	4
15421	17	female	3	2	face-with-monocle_1f9d0.png	thinking	3
15421	17	female	3	2	shocked-face-with-exploding-head_1f92f.png	mind blown	3
15421	17	female	3	2	smiling-face-with-smiling-eyes_1f60a.png	glad	4
15421	17	female	3	2	white-frowning-face_2639.png	actually sad	1
15421	17	female	3	2	zipper-mouth-face_1f910.png	minding my business	3
15421	17	female	3	2	face-with-pleading-eyes_1f97a.png	bottom emoji	2
15421	17	female	3	2	white-smiling-face_263a.png	really glad also bottom emoji	3
15421	17	female	3	2	smiling-face-with-halo_1f607.png	angel	3
15421	17	female	3	2	unamused-face_1f612.png	annoyed	1
15421	17	female	3	2	ghost_1f47b.png	snap	3
15421	17	female	3	2	pile-of-poo_1f4a9.png	shit	3
15421	17	female	3	2	sneezing-face_1f927.png	sick	3
15421	17	female	3	2	slightly-frowning-face_1f641.png	bored	3
15421	17	female	3	2	face-with-head-bandage_1f915.png	sick	3
15421	17	female	3	2	disappointed-but-relieved-face_1f625.png	my mom uses this one	3
15421	17	female	3	2	imp_1f47f.png	built different	3
15421	17	female	3	2	smiling-face-with-smiling-eyes_1f60a.png	glad	3
15421	17	female	3	2	pouting-face_1f621.png	angry	1
15421	17	female	3	2	clown-face_1f921.png	clown	1
15421	17	female	3	2	face-with-rolling-eyes_1f644.png	bruh	3
15421	17	female	3	2	ok-hand-sign_1f44c.png	ok	3
15421	17	female	3	2	fearful-face_1f628.png	speachless	3
15421	17	female	3	2	grinning-face-with-one-large-and-one-small-eye_1f92a.png	crackhead energy	3
15421	17	female	3	2	face-with-stuck-out-tongue_1f61b.png	cardi b noise	3
15421	17	female	3	2	relieved-face_1f60c.png	chill	3
15421	17	female	3	2	thumbs-down-sign_emoji-modifier-fitzpatrick-type-5_1f44e-1f3fe_1f3fe.png	thumbs down	3
15421	17	female	3	2	slightly-smiling-face_1f642.png	going crazy	3
15421	17	female	3	2	lying-face_1f925.png	lying	3
15421	17	female	3	2	frowning-face-with-open-mouth_1f626.png	damn really	3
15421	17	female	3	2	heavy-black-heart_2764.png	love to parents	3
15421	17	female	3	2	smiling-face-with-heart-shaped-eyes_1f60d.png	hearteyes for you	3
15421	17	female	3	2	kissing-face-with-closed-eyes_1f61a.png	flirt	4
15421	17	female	3	2	freezing-face_1f976.png	icy	4
15421	17	female	3	2	grinning-face_1f600.png	crazy happy	3
15421	17	female	3	2	face-with-party-horn-and-party-hat_1f973.png	congrats	5
15421	17	female	3	2	money-mouth-face_1f911.png	just got paid	5
15421	17	female	3	2	smiling-face-with-halo_1f607.png	angel	2
15421	17	female	3	2	grinning-face-with-star-eyes_1f929.png	sarcastic	5
15421	17	female	3	2	speech-balloon_1f4ac.png	who uses this	3
15421	17	female	3	2	expressionless-face_1f611.png	snake	1
15421	17	female	3	2	person-with-folded-hands_1f64f.png	pray	5
15421	17	female	3	2	smiling-face-with-smiling-eyes-and-three-hearts_1f970.png	feeling love	5
15421	17	female	3	2	upside-down-face_1f643.png	oof	1
15421	17	female	3	2	rolling-on-the-floor-laughing_1f923.png	ironoic jokes	5
15421	17	female	3	2	tired-face_1f62b.png	ew	3
15421	17	female	3	2	face-with-open-mouth-vomiting_1f92e (1).png	vomit	3
15421	17	female	3	2	person-raising-both-hands-in-celebration_1f64c.png	praise	3
15421	17	female	3	2	sleeping-face_1f634.png	sleep	3
15421	17	female	3	2	face-with-open-mouth-and-cold-sweat_1f630.png	damnnnn	3
15421	17	female	3	2	hushed-face_1f62f.png	huh	3
15421	17	female	3	2	hugging-face_1f917.png	yay	5
15421	17	female	3	2	flexed-biceps_1f4aa.png	grind	5
15421	17	female	3	2	worried-face_1f61f.png	backstabbed	3
15421	17	female	3	2	kissing-face-with-smiling-eyes_1f619.png	shade	3
15421	17	female	3	2	face-without-mouth_1f636.png	speachless	3
15421	17	female	3	2	face-with-stuck-out-tongue-and-tightly-closed-eyes_1f61d (1).png	ah	3
15421	17	female	3	2	overheated-face_1f975.png	damn again	3
15421	17	female	3	2	face-with-finger-covering-closed-lips_1f92b.png	shhh	3
15421	17	female	3	2	face-throwing-a-kiss_1f618.png	love to significant other	3
15421	17	female	3	2	thinking-face_1f914.png	hmmm	3
15421	17	female	3	2	sleepy-face_1f62a.png	sad damn	3
15421	17	female	3	2	grimacing-face_1f62c.png	yikes	2
15421	17	female	3	2	smiling-face-with-open-mouth-and-cold-sweat_1f605.png	relief	3
15421	17	female	3	2	face-with-thermometer_1f912.png	ill	2
15421	17	female	3	2	pensive-face_1f614.png	bruh heartbreak	3
15421	17	female	3	2	anguished-face_1f627.png	gasp	2
15421	17	female	3	2	persevering-face_1f623.png	nooo	2
15421	17	female	3	2	thumbs-up-sign_emoji-modifier-fitzpatrick-type-3_1f44d-1f3fc_1f3fc.png	good job	4
15421	17	female	3	2	yawning-face_1f971.png	bored	2
15421	17	female	3	2	smiling-face-with-open-mouth-and-tightly-closed-eyes_1f606.png	so excited	4
15421	17	female	3	2	neutral-face_1f610.png	ok and	3
15421	17	female	3	2	confounded-face_1f616.png	gross	3
16202	18	female	1	2	drooling-face_1f924.png	lustful	3
16202	18	female	1	2	face-with-open-mouth-vomiting_1f92e (1).png	disgusting	2
16202	18	female	1	2	sleepy-face_1f62a.png	unbothered	3
16202	18	female	1	2	unamused-face_1f612.png	annoyed	2
16202	18	female	1	2	kissing-face-with-smiling-eyes_1f619.png	thanks	3
16202	18	female	1	2	confounded-face_1f616.png	pressed	2
16202	18	female	1	2	flushed-face_1f633.png	embarassed	2
16202	18	female	1	2	thumbs-up-sign_emoji-modifier-fitzpatrick-type-3_1f44d-1f3fc_1f3fc.png	good job	4
16202	18	female	1	2	pouting-face_1f621.png	mad	1
16202	18	female	1	2	sleeping-face_1f634.png	snooz	4
16202	18	female	1	2	expressionless-face_1f611.png	just heard something very stupid	2
16202	18	female	1	2	winking-face_1f609.png	luck	5
16202	18	female	1	2	smiling-face-with-heart-shaped-eyes_1f60d.png	loving it	4
16202	18	female	1	2	face-throwing-a-kiss_1f618.png	besitos	4
16202	18	female	1	2	face-with-head-bandage_1f915.png	injured	3
16202	18	female	1	2	face-with-pleading-eyes_1f97a.png	adorable	5
16202	18	female	1	2	face-with-stuck-out-tongue-and-tightly-closed-eyes_1f61d.png	silly	4
16202	18	female	1	2	nerd-face_1f913.png	nerd	2
16202	18	female	1	2	face-with-open-mouth-vomiting_1f92e.png	gross	2
16202	18	female	1	2	clown-face_1f921.png	clownin	2
16202	18	female	1	2	shocked-face-with-exploding-head_1f92f.png	earth shattering	3
16202	18	female	1	2	face-with-finger-covering-closed-lips_1f92b.png	shut it	2
16202	18	female	1	2	grinning-face-with-one-large-and-one-small-eye_1f92a.png	crazy	4
16202	18	female	1	2	grinning-face-with-smiling-eyes_1f601.png	happy	3
16202	18	female	1	2	frowning-face-with-open-mouth_1f626.png	shocked	3
16202	18	female	1	2	loudly-crying-face_1f62d.png	llora	2
16202	18	female	1	2	smiling-face-with-open-mouth_1f603.png	happy	3
16202	18	female	1	2	ghost_1f47b.png	ghost	3
16202	18	female	1	2	angry-face_1f620.png	mad	2
16202	18	female	1	2	smiling-face-with-halo_1f607.png	angel	4
16202	18	female	1	2	persevering-face_1f623.png	frustration	3
16202	18	female	1	2	face-with-uneven-eyes-and-wavy-mouth_1f974.png	queasy	2
16202	18	female	1	2	white-frowning-face_2639.png	very disapointed	1
16202	18	female	1	2	upside-down-face_1f643.png	so so	3
16202	18	female	1	2	face-screaming-in-fear_1f631.png	shock	3
16202	18	female	1	2	anguished-face_1f627.png	shock	3
16202	18	female	1	2	smiling-face-with-smiling-eyes_1f60a.png	welcome	4
16202	18	female	1	2	smiling-face-with-halo_1f607.png	angel	4
16202	18	female	1	2	money-mouth-face_1f911.png	money moves	5
16202	18	female	1	2	smiling-face-with-smiling-eyes_1f60a.png	cute	4
16202	18	female	1	2	dizzy-face_1f635.png	dead	2
16202	18	female	1	2	face-savouring-delicious-food_1f60b.png	yum	3
16202	18	female	1	2	grimacing-face_1f62c.png	yikes	2
16202	18	female	1	2	relieved-face_1f60c.png	sympathy	4
16202	18	female	1	2	serious-face-with-symbols-covering-mouth_1f92c.png	mad	1
16202	18	female	1	2	face-with-open-mouth-and-cold-sweat_1f630.png	nervous	3
16202	18	female	1	2	heavy-black-heart_2764.png	love	4
16202	18	female	1	2	smiling-face-with-open-mouth-and-cold-sweat_1f605.png	no sweat	2
16202	18	female	1	2	face-with-one-eyebrow-raised_1f928.png	thoughtful	2
16202	18	female	1	2	speech-balloon_1f4ac.png	paragraph	1
16202	18	female	1	2	two-hearts_1f495.png	love	4
16202	18	female	1	2	slightly-smiling-face_1f642.png	fine	3
16202	18	female	1	2	smiling-face-with-smiling-eyes-and-three-hearts_1f970.png	in love	5
16202	18	female	1	2	ok-hand-sign_1f44c.png	ok	3
16202	18	female	1	2	smiling-face-with-open-mouth-and-smiling-eyes_1f604.png	happy	3
16202	18	female	1	2	confused-face_1f615.png	unsure	2
16202	18	female	1	2	overheated-face_1f975.png	oof	2
16202	18	female	1	2	pile-of-poo_1f4a9.png	mierda	2
16202	18	female	1	2	freezing-face_1f976.png	icy	3
16202	18	female	1	2	pensive-face_1f614.png	sad	2
16202	18	female	1	2	sneezing-face_1f927.png	take it easy on me	4
16202	18	female	1	2	face-with-open-mouth_1f62e.png	shock	3
16202	18	female	1	2	face-with-party-horn-and-party-hat_1f973.png	party	5
16202	18	female	1	2	face-with-cold-sweat_1f613.png	down in the dumps	2
16202	18	female	1	2	face-with-monocle_1f9d0.png	inquisitive	2
16202	18	female	1	2	hushed-face_1f62f.png	oops	3
16202	18	female	1	2	fearful-face_1f628.png	oh my	2
16202	18	female	1	2	astonished-face_1f632.png	oh shoot	2
16202	18	female	1	2	left-facing-fist_1f91b.png	sup	4
16202	18	female	1	2	neutral-face_1f610.png	no words	1
16202	18	female	1	2	nauseated-face_1f922.png	sick	1
16202	18	female	1	2	white-smiling-face_263a.png	cute	4
16202	18	female	1	2	victory-hand_270c.png	peace	3
16202	18	female	1	2	lying-face_1f925.png	liar	2
16202	18	female	1	2	face-with-stuck-out-tongue-and-tightly-closed-eyes_1f61d (1).png	excite	5
16202	18	female	1	2	kissing-face_1f617.png	platonic	3
16202	18	female	1	2	disappointed-face_1f61e.png	down	2
16202	18	female	1	2	kissing-face-with-closed-eyes_1f61a.png	friednly	5
16202	18	female	1	2	face-with-thermometer_1f912.png	sick	3
16202	18	female	1	2	grinning-face_1f600.png	fine	3
16202	18	female	1	2	smiling-face-with-smiling-eyes-and-hand-covering-mouth_1f92d.png	oops	2
16202	18	female	1	2	face-without-mouth_1f636.png	nothing	3
16202	18	female	1	2	person-raising-both-hands-in-celebration_1f64c.png	praise	5
16202	18	female	1	2	yawning-face_1f971.png	bored	1
16202	18	female	1	2	crying-face_1f622.png	pain	2
16202	18	female	1	2	zipper-mouth-face_1f910.png	secret	4
16202	18	female	1	2	tired-face_1f62b.png	anger	3
16202	18	female	1	2	imp_1f47f.png	devilish	2
16202	18	female	1	2	face-with-stuck-out-tongue_1f61b.png	cute	4
16202	18	female	1	2	smirking-face_1f60f.png	mysterious	2
16202	18	female	1	2	face-with-cowboy-hat_1f920.png	howdy	1
16202	18	female	1	2	weary-face_1f629.png	upset	2
16202	18	female	1	2	slightly-frowning-face_1f641.png	sad and unsure	2
16202	18	female	1	2	rolling-on-the-floor-laughing_1f923.png	laugh	4
16202	18	female	1	2	smiling-face-with-smiling-eyes-and-three-hearts_1f970.png	love	5
16202	18	female	1	2	thinking-face_1f914.png	unsure 4	3
16202	18	female	1	2	thumbs-down-sign_emoji-modifier-fitzpatrick-type-5_1f44e-1f3fe_1f3fe.png	bad	1
16202	18	female	1	2	smiling-face-with-open-mouth-and-tightly-closed-eyes_1f606.png	yay	4
16202	18	female	1	2	grinning-face-with-star-eyes_1f929.png	loving it	5
16202	18	female	1	2	disappointed-but-relieved-face_1f625.png	down	1
16202	18	female	1	2	flexed-biceps_1f4aa.png	strong	2
16202	18	female	1	2	worried-face_1f61f.png	scared	2
16202	18	female	1	2	smiling-face-with-sunglasses_1f60e.png	cool	3
16202	18	female	1	2	face-with-tears-of-joy_1f602.png	haha	4
16202	18	female	1	2	person-with-folded-hands_1f64f.png	pray	3
16202	18	female	1	2	hugging-face_1f917.png	welcome	4
16202	18	female	1	2	face-with-look-of-triumph_1f624.png	mad	1
16202	18	female	1	2	face-with-rolling-eyes_1f644.png	annoyed	1
16352	20	female	2	2	smiling-face-with-halo_1f607.png	holy	3
16352	20	female	2	2	smiling-face-with-open-mouth_1f603.png	excited	5
16352	20	female	2	2	smiling-face-with-sunglasses_1f60e.png	cool	4
16352	20	female	2	2	yawning-face_1f971.png	tired	2
16352	20	female	2	2	face-with-stuck-out-tongue_1f61b.png	silly	4
16352	20	female	2	2	smiling-face-with-heart-shaped-eyes_1f60d.png	in love	5
16352	20	female	2	2	astonished-face_1f632.png	shocked	3
16352	20	female	2	2	ghost_1f47b.png	spooky	2
16352	20	female	2	2	two-hearts_1f495.png	love	4
16352	20	female	2	2	nauseated-face_1f922.png	disgusted	1
16352	20	female	2	2	neutral-face_1f610.png	neutral	3
16352	20	female	2	2	smiling-face-with-smiling-eyes-and-hand-covering-mouth_1f92d.png	speechless	3
16352	20	female	2	2	smiling-face-with-smiling-eyes_1f60a.png	happy	4
16352	20	female	2	2	worried-face_1f61f.png	scared	2
16352	20	female	2	2	crying-face_1f622.png	sad	2
16352	20	female	2	2	expressionless-face_1f611.png	annoyed	2
16352	20	female	2	2	loudly-crying-face_1f62d.png	very upset	1
16352	20	female	2	2	smirking-face_1f60f.png	sly	3
16352	20	female	2	2	face-with-pleading-eyes_1f97a.png	in awe	3
16352	20	female	2	2	white-frowning-face_2639.png	unhappy	2
16352	20	female	2	2	angry-face_1f620.png	mad	2
16352	20	female	2	2	smiling-face-with-open-mouth-and-cold-sweat_1f605.png	refreshed	4
16352	20	female	2	2	nerd-face_1f913.png	nerdy	3
16352	20	female	2	2	persevering-face_1f623.png	worried	2
16352	20	female	2	2	grinning-face_1f600.png	happy	5
16352	20	female	2	2	lying-face_1f925.png	lying	2
16352	20	female	2	2	kissing-face-with-closed-eyes_1f61a.png	loving	4
16352	20	female	2	2	overheated-face_1f975.png	exhausted	2
16352	20	female	2	2	confused-face_1f615.png	meh	2
16352	20	female	2	2	smiling-face-with-halo_1f607.png	holy	3
16352	20	female	2	2	slightly-frowning-face_1f641.png	meh	3
16352	20	female	2	2	face-without-mouth_1f636.png	speechless	3
16352	20	female	2	2	face-with-thermometer_1f912.png	sick	2
16352	20	female	2	2	victory-hand_270c.png	peace	4
16352	20	female	2	2	face-with-stuck-out-tongue-and-tightly-closed-eyes_1f61d (1).png	goofy	4
16352	20	female	2	2	kissing-face_1f617.png	kissy	4
16352	20	female	2	2	hushed-face_1f62f.png	gasp	3
16352	20	female	2	2	pensive-face_1f614.png	bummed	2
16352	20	female	2	2	smiling-face-with-smiling-eyes-and-three-hearts_1f970.png	in love	4
16352	20	female	2	2	thumbs-down-sign_emoji-modifier-fitzpatrick-type-5_1f44e-1f3fe_1f3fe.png	negative	2
16352	20	female	2	2	imp_1f47f.png	mischievous	2
16352	20	female	2	2	zipper-mouth-face_1f910.png	lips are sealed	3
16352	20	female	2	2	sleepy-face_1f62a.png	drained	2
16352	20	female	2	2	disappointed-but-relieved-face_1f625.png	upset	2
16352	20	female	2	2	face-with-one-eyebrow-raised_1f928.png	confused	3
16352	20	female	2	2	flushed-face_1f633.png	embarrassed	2
16352	20	female	2	2	relieved-face_1f60c.png	content	3
16352	20	female	2	2	serious-face-with-symbols-covering-mouth_1f92c.png	pissed off	1
16352	20	female	2	2	grinning-face-with-one-large-and-one-small-eye_1f92a.png	goofy	4
16352	20	female	2	2	face-with-rolling-eyes_1f644.png	sarcastic	2
16352	20	female	2	2	person-raising-both-hands-in-celebration_1f64c.png	praise	4
16352	20	female	2	2	pouting-face_1f621.png	angry	2
16352	20	female	2	2	white-smiling-face_263a.png	blushing	4
16352	20	female	2	2	person-with-folded-hands_1f64f.png	fortunate	4
16352	20	female	2	2	face-savouring-delicious-food_1f60b.png	silly	4
16352	20	female	2	2	tired-face_1f62b.png	desperate	2
16352	20	female	2	2	shocked-face-with-exploding-head_1f92f.png	overwhelmed	2
16352	20	female	2	2	thinking-face_1f914.png	curious	3
16352	20	female	2	2	face-with-cowboy-hat_1f920.png	cowboy	3
16352	20	female	2	2	anguished-face_1f627.png	disbelief	2
16352	20	female	2	2	face-with-open-mouth-and-cold-sweat_1f630.png	concerned	2
16352	20	female	2	2	face-with-finger-covering-closed-lips_1f92b.png	quiet	3
16352	20	female	2	2	face-with-head-bandage_1f915.png	headache	2
16352	20	female	2	2	frowning-face-with-open-mouth_1f626.png	shocked	2
16352	20	female	2	2	face-throwing-a-kiss_1f618.png	flirty	4
16352	20	female	2	2	kissing-face-with-smiling-eyes_1f619.png	crushing	4
16352	20	female	2	2	grinning-face-with-smiling-eyes_1f601.png	ecstatic	5
16352	20	female	2	2	hugging-face_1f917.png	glad	4
16352	20	female	2	2	pile-of-poo_1f4a9.png	shitty	1
16352	20	female	2	2	sleeping-face_1f634.png	sleepy	3
16352	20	female	2	2	thumbs-up-sign_emoji-modifier-fitzpatrick-type-3_1f44d-1f3fc_1f3fc.png	all good	4
16352	20	female	2	2	face-with-stuck-out-tongue-and-tightly-closed-eyes_1f61d.png	feeling funny	4
16352	20	female	2	2	smiling-face-with-open-mouth-and-smiling-eyes_1f604.png	excited	5
16352	20	female	2	2	fearful-face_1f628.png	upset or worried	2
16352	20	female	2	2	face-with-uneven-eyes-and-wavy-mouth_1f974.png	drunk	3
16352	20	female	2	2	drooling-face_1f924.png	zoning out	2
16352	20	female	2	2	speech-balloon_1f4ac.png	ellipsis	3
16352	20	female	2	2	flexed-biceps_1f4aa.png	strong	4
16352	20	female	2	2	confounded-face_1f616.png	whiney	2
16352	20	female	2	2	face-with-cold-sweat_1f613.png	bummed	2
16352	20	female	2	2	smiling-face-with-smiling-eyes_1f60a.png	happy	4
16352	20	female	2	2	disappointed-face_1f61e.png	sad	2
16352	20	female	2	2	weary-face_1f629.png	cranky	2
16352	20	female	2	2	rolling-on-the-floor-laughing_1f923.png	giggly	3
16352	20	female	2	2	face-with-open-mouth_1f62e.png	shocked	3
16352	20	female	2	2	upside-down-face_1f643.png	feeling kind of off	3
16352	20	female	2	2	face-with-open-mouth-vomiting_1f92e.png	grossed out	1
16352	20	female	2	2	face-with-monocle_1f9d0.png	smart	4
16352	20	female	2	2	grinning-face-with-star-eyes_1f929.png	ambitious	4
16352	20	female	2	2	smiling-face-with-smiling-eyes-and-three-hearts_1f970.png	affectionate	4
16352	20	female	2	2	grimacing-face_1f62c.png	nervous	3
16352	20	female	2	2	unamused-face_1f612.png	annoyed	2
16352	20	female	2	2	money-mouth-face_1f911.png	hardworking	4
16352	20	female	2	2	clown-face_1f921.png	foolish	2
16352	20	female	2	2	winking-face_1f609.png	playful	4
16352	20	female	2	2	left-facing-fist_1f91b.png	fist pump	4
16352	20	female	2	2	face-with-party-horn-and-party-hat_1f973.png	partying	4
16352	20	female	2	2	heavy-black-heart_2764.png	love	5
16352	20	female	2	2	slightly-smiling-face_1f642.png	good	4
16352	20	female	2	2	sneezing-face_1f927.png	sick	2
16352	20	female	2	2	ok-hand-sign_1f44c.png	a ok	4
16352	20	female	2	2	face-with-open-mouth-vomiting_1f92e (1).png	disgusted	1
16352	20	female	2	2	face-with-tears-of-joy_1f602.png	hilarious	4
16352	20	female	2	2	smiling-face-with-open-mouth-and-tightly-closed-eyes_1f606.png	excited	5
16352	20	female	2	2	face-screaming-in-fear_1f631.png	scared shitless	1
16352	20	female	2	2	freezing-face_1f976.png	freezing	1
16352	20	female	2	2	dizzy-face_1f635.png	dead	2
16352	20	female	2	2	face-with-look-of-triumph_1f624.png	ticked off	1
16455	18	male	2	2	smiling-face-with-smiling-eyes-and-hand-covering-mouth_1f92d.png	ope	5
16455	18	male	2	2	grinning-face_1f600.png	happy	3
16455	18	male	2	2	face-with-tears-of-joy_1f602.png	lol	3
16455	18	male	2	2	face-with-cowboy-hat_1f920.png	yeeyee	1
16455	18	male	2	2	crying-face_1f622.png		2
16455	18	male	2	2	smiling-face-with-sunglasses_1f60e.png	cool guy	3
16455	18	male	2	2	zipper-mouth-face_1f910.png		2
16455	18	male	2	2	ok-hand-sign_1f44c.png	okay	4
16455	18	male	2	2	pensive-face_1f614.png	sad	3
16455	18	male	2	2	face-with-open-mouth-vomiting_1f92e (1).png	bleh	3
16455	18	male	2	2	person-raising-both-hands-in-celebration_1f64c.png	praise jesus	2
16455	18	male	2	2	smiling-face-with-open-mouth_1f603.png	fask	3
16455	18	male	2	2	frowning-face-with-open-mouth_1f626.png	ope but make it scared	3
16455	18	male	2	2	serious-face-with-symbols-covering-mouth_1f92c.png	curseing	4
16455	18	male	2	2	face-with-stuck-out-tongue-and-tightly-closed-eyes_1f61d.png	tounge	2
16455	18	male	2	2	smiling-face-with-smiling-eyes_1f60a.png	thank you	4
16455	18	male	2	2	confused-face_1f615.png	meh	4
16455	18	male	2	2	weary-face_1f629.png	eh	2
16455	18	male	2	2	upside-down-face_1f643.png	not happ	3
16455	18	male	2	2	face-with-finger-covering-closed-lips_1f92b.png	shh	3
16455	18	male	2	2	pouting-face_1f621.png	anger	4
16455	18	male	2	2	face-with-rolling-eyes_1f644.png	ope but make it whatever	3
16455	18	male	2	2	person-with-folded-hands_1f64f.png	praying	2
16455	18	male	2	2	smiling-face-with-halo_1f607.png	halo	3
16455	18	male	2	2	grinning-face-with-star-eyes_1f929.png	sarcatsic	3
16455	18	male	2	2	tired-face_1f62b.png	eeek	2
16455	18	male	2	2	white-frowning-face_2639.png	sad	3
16455	18	male	2	2	face-with-monocle_1f9d0.png	curious	2
16455	18	male	2	2	overheated-face_1f975.png	hawt	4
16455	18	male	2	2	drooling-face_1f924.png	damn	2
16455	18	male	2	2	confounded-face_1f616.png	sneeze	3
16455	18	male	2	2	thumbs-up-sign_emoji-modifier-fitzpatrick-type-3_1f44d-1f3fc_1f3fc.png	thumps up	4
16455	18	male	2	2	money-mouth-face_1f911.png	money	2
16455	18	male	2	2	angry-face_1f620.png	anger	2
16455	18	male	2	2	astonished-face_1f632.png	oh	2
16455	18	male	2	2	unamused-face_1f612.png	whateves	4
16455	18	male	2	2	nauseated-face_1f922.png	barf	3
16455	18	male	2	2	shocked-face-with-exploding-head_1f92f.png	ded	2
16455	18	male	2	2	grinning-face-with-one-large-and-one-small-eye_1f92a.png	emily	2
16455	18	male	2	2	imp_1f47f.png	grindr	2
16455	18	male	2	2	left-facing-fist_1f91b.png	bump	2
16455	18	male	2	2	face-with-uneven-eyes-and-wavy-mouth_1f974.png	okay	3
16455	18	male	2	2	expressionless-face_1f611.png	neat	2
16455	18	male	2	2	sneezing-face_1f927.png	sneze but covered	2
16455	18	male	2	2	worried-face_1f61f.png	sad	2
16455	18	male	2	2	thumbs-down-sign_emoji-modifier-fitzpatrick-type-5_1f44e-1f3fe_1f3fe.png	down	3
16455	18	male	2	2	kissing-face-with-smiling-eyes_1f619.png	puker up	2
16455	18	male	2	2	face-with-open-mouth_1f62e.png	ope	2
16455	18	male	2	2	fearful-face_1f628.png	ope	2
16455	18	male	2	2	face-with-stuck-out-tongue_1f61b.png	bleeeh	2
16455	18	male	2	2	flexed-biceps_1f4aa.png	strong	1
16455	18	male	2	2	dizzy-face_1f635.png	dead	5
16455	18	male	2	2	grimacing-face_1f62c.png	clenched	3
16455	18	male	2	2	face-without-mouth_1f636.png	ope	3
16455	18	male	2	2	smiling-face-with-open-mouth-and-cold-sweat_1f605.png	hehehe	2
16455	18	male	2	2	face-throwing-a-kiss_1f618.png	kis	2
16455	18	male	2	2	face-with-stuck-out-tongue-and-tightly-closed-eyes_1f61d (1).png	xd	2
16455	18	male	2	2	smiling-face-with-smiling-eyes-and-three-hearts_1f970.png	loving	5
16455	18	male	2	2	kissing-face-with-closed-eyes_1f61a.png	kiss but blishy	2
16455	18	male	2	2	sleepy-face_1f62a.png	sleepy	3
16455	18	male	2	2	persevering-face_1f623.png	worrried	2
16455	18	male	2	2	clown-face_1f921.png	clown	2
16455	18	male	2	2	smiling-face-with-halo_1f607.png	angle	3
16455	18	male	2	2	speech-balloon_1f4ac.png	typing	1
16455	18	male	2	2	anguished-face_1f627.png	ope	3
16455	18	male	2	2	face-with-open-mouth-vomiting_1f92e.png	barf	3
16455	18	male	2	2	face-with-party-horn-and-party-hat_1f973.png	birthday	2
16455	18	male	2	2	face-with-open-mouth-and-cold-sweat_1f630.png	worried ope	3
16455	18	male	2	2	smirking-face_1f60f.png	i see you	2
16455	18	male	2	2	smiling-face-with-smiling-eyes-and-three-hearts_1f970.png	loving	3
16455	18	male	2	2	rolling-on-the-floor-laughing_1f923.png	fake laughing	3
16455	18	male	2	2	loudly-crying-face_1f62d.png	cryimg	4
16455	18	male	2	2	disappointed-but-relieved-face_1f625.png	worried	3
16455	18	male	2	2	face-screaming-in-fear_1f631.png	sjocked	3
16455	18	male	2	2	face-with-head-bandage_1f915.png	hurt	5
16455	18	male	2	2	thinking-face_1f914.png	hmmm	3
16455	18	male	2	2	sleeping-face_1f634.png	zzzzz	3
16455	18	male	2	2	freezing-face_1f976.png	cold	2
16455	18	male	2	2	face-with-pleading-eyes_1f97a.png	bottoms	2
16455	18	male	2	2	pile-of-poo_1f4a9.png	poopy face	1
16455	18	male	2	2	two-hearts_1f495.png	herats	2
16455	18	male	2	2	neutral-face_1f610.png	neat	4
16455	18	male	2	2	lying-face_1f925.png	liar	2
16455	18	male	2	2	nerd-face_1f913.png	geek	2
16455	18	male	2	2	ghost_1f47b.png	booo	1
16455	18	male	2	2	slightly-smiling-face_1f642.png	tehehe	3
16455	18	male	2	2	face-with-cold-sweat_1f613.png	worred	2
16455	18	male	2	2	face-with-thermometer_1f912.png	sick	2
16455	18	male	2	2	white-smiling-face_263a.png	thank you	2
16455	18	male	2	2	hushed-face_1f62f.png	ope	2
16455	18	male	2	2	face-savouring-delicious-food_1f60b.png	yuuum	2
16455	18	male	2	2	face-with-one-eyebrow-raised_1f928.png	oof	5
16455	18	male	2	2	smiling-face-with-smiling-eyes_1f60a.png	yay	3
16455	18	male	2	2	smiling-face-with-heart-shaped-eyes_1f60d.png	luv u	4
16455	18	male	2	2	smiling-face-with-open-mouth-and-smiling-eyes_1f604.png	yay	2
16455	18	male	2	2	hugging-face_1f917.png		2
16455	18	male	2	2	slightly-frowning-face_1f641.png	nope	2
16455	18	male	2	2	flushed-face_1f633.png	oooooh	2
16455	18	male	2	2	victory-hand_270c.png	peaceout	3
16455	18	male	2	2	kissing-face_1f617.png	kiss	2
16455	18	male	2	2	grinning-face-with-smiling-eyes_1f601.png	yeeee	4
16455	18	male	2	2	disappointed-face_1f61e.png	aawwww	1
16455	18	male	2	2	yawning-face_1f971.png	yawn	2
16455	18	male	2	2	winking-face_1f609.png	wink	5
16455	18	male	2	2	smiling-face-with-open-mouth-and-tightly-closed-eyes_1f606.png	hahahah	3
16455	18	male	2	2	relieved-face_1f60c.png	yes	5
16455	18	male	2	2	face-with-look-of-triumph_1f624.png	okay barabra	3
16455	18	male	2	2	heavy-black-heart_2764.png	love	2
17917	18	male	1	3	face-with-stuck-out-tongue-and-tightly-closed-eyes_1f61d.png	Quirky	4
17917	18	male	1	3	heavy-black-heart_2764.png	love	5
17917	18	male	1	3	victory-hand_270c.png	peace	5
17917	18	male	1	3	face-with-tears-of-joy_1f602.png	lauging	5
17917	18	male	1	3	person-with-folded-hands_1f64f.png	prayer	3
17917	18	male	1	3	relieved-face_1f60c.png	content	4
17917	18	male	1	3	person-raising-both-hands-in-celebration_1f64c.png	double high five	5
17917	18	male	1	3	smiling-face-with-smiling-eyes_1f60a.png	blushing	5
17917	18	male	1	3	face-with-party-horn-and-party-hat_1f973.png	party	5
17917	18	male	1	3	smiling-face-with-smiling-eyes-and-hand-covering-mouth_1f92d.png	Oh my god	2
17917	18	male	1	3	sleeping-face_1f634.png	sleep	3
17917	18	male	1	3	face-with-thermometer_1f912.png	fever	1
17917	18	male	1	3	face-with-monocle_1f9d0.png	curious	3
17917	18	male	1	3	sneezing-face_1f927.png	sick	2
17917	18	male	1	3	face-with-head-bandage_1f915.png	injured	1
17917	18	male	1	3	hushed-face_1f62f.png	suprised	3
17917	18	male	1	3	slightly-smiling-face_1f642.png	happy	5
17917	18	male	1	3	face-with-finger-covering-closed-lips_1f92b.png	qiet	3
17917	18	male	1	3	sleepy-face_1f62a.png	sniffle	1
17917	18	male	1	3	smirking-face_1f60f.png	Smirk	4
17917	18	male	1	3	persevering-face_1f623.png	cringe	2
17917	18	male	1	3	serious-face-with-symbols-covering-mouth_1f92c.png	curse	1
17917	18	male	1	3	upside-down-face_1f643.png	upside down smiley face	5
17917	18	male	1	3	frowning-face-with-open-mouth_1f626.png	shock	2
17917	18	male	1	3	face-screaming-in-fear_1f631.png	fear	1
17917	18	male	1	3	smiling-face-with-open-mouth_1f603.png	extremley joyful	5
17917	18	male	1	3	unamused-face_1f612.png	over it	1
17917	18	male	1	3	expressionless-face_1f611.png	are you kidding me	1
17917	18	male	1	3	face-without-mouth_1f636.png	no comment	3
17917	18	male	1	3	nauseated-face_1f922.png	puke	1
17917	18	male	1	3	face-with-cold-sweat_1f613.png	stressed	1
17917	18	male	1	3	money-mouth-face_1f911.png	money	5
17917	18	male	1	3	white-frowning-face_2639.png	frown	1
17917	18	male	1	3	pouting-face_1f621.png	anger	1
17917	18	male	1	3	confounded-face_1f616.png	petrified	1
17917	18	male	1	3	tired-face_1f62b.png	moan	3
17917	18	male	1	3	smiling-face-with-smiling-eyes-and-three-hearts_1f970.png	more blush	5
17917	18	male	1	3	kissing-face-with-smiling-eyes_1f619.png	light kiss	4
17917	18	male	1	3	thumbs-down-sign_emoji-modifier-fitzpatrick-type-5_1f44e-1f3fe_1f3fe.png	thumbs down	1
17917	18	male	1	3	smiling-face-with-sunglasses_1f60e.png	cool	5
17917	18	male	1	3	weary-face_1f629.png	moan	2
17917	18	male	1	3	face-with-rolling-eyes_1f644.png	eye rolling	2
17917	18	male	1	3	imp_1f47f.png	angry demon	1
17917	18	male	1	3	smiling-face-with-open-mouth-and-smiling-eyes_1f604.png	laughter	5
17917	18	male	1	3	face-with-open-mouth_1f62e.png	suprised	3
17917	18	male	1	3	smiling-face-with-open-mouth-and-tightly-closed-eyes_1f606.png	happy and excited	5
17917	18	male	1	3	flushed-face_1f633.png	nervous	1
17917	18	male	1	3	face-with-stuck-out-tongue_1f61b.png	goofy	4
17917	18	male	1	3	shocked-face-with-exploding-head_1f92f.png	mind blown	3
17917	18	male	1	3	face-with-pleading-eyes_1f97a.png	tearing up	1
17917	18	male	1	3	yawning-face_1f971.png	yawn	3
17917	18	male	1	3	lying-face_1f925.png	pinochio	1
17917	18	male	1	3	confused-face_1f615.png	oh well	2
17917	18	male	1	3	disappointed-face_1f61e.png	depressed	1
17917	18	male	1	3	smiling-face-with-smiling-eyes_1f60a.png	blush	5
17917	18	male	1	3	face-with-look-of-triumph_1f624.png	Angry	1
17917	18	male	1	3	speech-balloon_1f4ac.png	typing	1
17917	18	male	1	3	crying-face_1f622.png	tear drop	1
17917	18	male	1	3	thumbs-up-sign_emoji-modifier-fitzpatrick-type-3_1f44d-1f3fc_1f3fc.png	thumbs up	5
17917	18	male	1	3	clown-face_1f921.png	clown	1
17917	18	male	1	3	astonished-face_1f632.png	no way	3
17917	18	male	1	3	smiling-face-with-halo_1f607.png	angel	5
17917	18	male	1	3	neutral-face_1f610.png	whatever	5
17917	18	male	1	3	grinning-face-with-star-eyes_1f929.png	beauty	5
17917	18	male	1	3	smiling-face-with-smiling-eyes-and-three-hearts_1f970.png	more blush	5
17917	18	male	1	3	disappointed-but-relieved-face_1f625.png	distress	1
17917	18	male	1	3	smiling-face-with-open-mouth-and-cold-sweat_1f605.png	nervous	1
17917	18	male	1	3	slightly-frowning-face_1f641.png	upset	1
17917	18	male	1	3	face-with-cowboy-hat_1f920.png	cowboy	5
17917	18	male	1	3	loudly-crying-face_1f62d.png	sobbing	1
17917	18	male	1	3	face-with-stuck-out-tongue-and-tightly-closed-eyes_1f61d (1).png	yo	3
17917	18	male	1	3	grinning-face-with-smiling-eyes_1f601.png	cheery	5
17917	18	male	1	3	fearful-face_1f628.png	terrified	1
17917	18	male	1	3	face-with-open-mouth-vomiting_1f92e (1).png	puke	1
17917	18	male	1	3	winking-face_1f609.png	wink	3
17917	18	male	1	3	face-savouring-delicious-food_1f60b.png	tasty	5
17917	18	male	1	3	pensive-face_1f614.png	down	1
17917	18	male	1	3	drooling-face_1f924.png	salivate	5
17917	18	male	1	3	ok-hand-sign_1f44c.png	ok	3
17917	18	male	1	3	face-with-uneven-eyes-and-wavy-mouth_1f974.png	queezy	5
17917	18	male	1	3	grinning-face-with-one-large-and-one-small-eye_1f92a.png	goofy	3
17917	18	male	1	3	zipper-mouth-face_1f910.png	lips are sealed	5
17917	18	male	1	3	freezing-face_1f976.png	cold	3
17917	18	male	1	3	worried-face_1f61f.png	why me	1
17917	18	male	1	3	rolling-on-the-floor-laughing_1f923.png	laugh	5
17917	18	male	1	3	kissing-face-with-closed-eyes_1f61a.png	kiss and blush	5
17917	18	male	1	3	face-throwing-a-kiss_1f618.png	kiss and wink	5
17917	18	male	1	3	nerd-face_1f913.png	nerd	1
17917	18	male	1	3	pile-of-poo_1f4a9.png	poop	1
17917	18	male	1	3	left-facing-fist_1f91b.png	fist bump	5
17917	18	male	1	3	dizzy-face_1f635.png	dead	1
17917	18	male	1	3	thinking-face_1f914.png	wonder	3
17917	18	male	1	3	anguished-face_1f627.png	no way	1
17917	18	male	1	3	grimacing-face_1f62c.png	that is not good	1
17917	18	male	1	3	face-with-one-eyebrow-raised_1f928.png	investigate	3
17917	18	male	1	3	white-smiling-face_263a.png	yay	5
17917	18	male	1	3	face-with-open-mouth-and-cold-sweat_1f630.png	anticipation	1
17917	18	male	1	3	grinning-face_1f600.png	cheer	4
17917	18	male	1	3	face-with-open-mouth-vomiting_1f92e.png	puke	5
17917	18	male	1	3	ghost_1f47b.png	ghost	3
17917	18	male	1	3	flexed-biceps_1f4aa.png	muscle	4
17917	18	male	1	3	two-hearts_1f495.png	heart	5
17917	18	male	1	3	smiling-face-with-halo_1f607.png	angel	5
17917	18	male	1	3	kissing-face_1f617.png	kiss	4
17917	18	male	1	3	smiling-face-with-heart-shaped-eyes_1f60d.png	in love	5
17917	18	male	1	3	angry-face_1f620.png	anger	1
17917	18	male	1	3	hugging-face_1f917.png	jazz hands	5
17917	18	male	1	3	overheated-face_1f975.png	thirsty	1
18980	32	female	1	2	face-without-mouth_1f636.png	uh oh	2
18980	32	female	1	2	clown-face_1f921.png	happy	4
18980	32	female	1	2	relieved-face_1f60c.png	loved	5
18980	32	female	1	2	overheated-face_1f975.png	angry sweating dont feel good	2
18980	32	female	1	2	lying-face_1f925.png	telling lies	1
18980	32	female	1	2	face-with-monocle_1f9d0.png	clueless	3
18980	32	female	1	2	speech-balloon_1f4ac.png	to be contiuned	3
18980	32	female	1	2	white-smiling-face_263a.png	happy loved	5
18980	32	female	1	2	smiling-face-with-smiling-eyes-and-three-hearts_1f970.png	loved excited	5
18980	32	female	1	2	shocked-face-with-exploding-head_1f92f.png	brain explosion	3
18980	32	female	1	2	sleepy-face_1f62a.png	sad	3
18980	32	female	1	2	face-with-open-mouth-and-cold-sweat_1f630.png	very cold	2
18980	32	female	1	2	hushed-face_1f62f.png	wow	3
18980	32	female	1	2	face-with-thermometer_1f912.png	sick	2
18980	32	female	1	2	person-with-folded-hands_1f64f.png	prayers	5
18980	32	female	1	2	disappointed-but-relieved-face_1f625.png	sad	2
18980	32	female	1	2	disappointed-face_1f61e.png	sad	2
18980	32	female	1	2	serious-face-with-symbols-covering-mouth_1f92c.png	very mad with cuss words	1
18980	32	female	1	2	person-raising-both-hands-in-celebration_1f64c.png	prayers	5
18980	32	female	1	2	worried-face_1f61f.png	umm	4
18980	32	female	1	2	frowning-face-with-open-mouth_1f626.png	wow	3
18980	32	female	1	2	face-with-pleading-eyes_1f97a.png	upset	2
18980	32	female	1	2	smirking-face_1f60f.png	upset sad	2
18980	32	female	1	2	slightly-smiling-face_1f642.png	happy	4
18980	32	female	1	2	left-facing-fist_1f91b.png	you got this	5
18980	32	female	1	2	face-with-open-mouth-vomiting_1f92e (1).png	puking	1
18980	32	female	1	2	face-with-cold-sweat_1f613.png	don t feel good with a fever	2
18980	32	female	1	2	upside-down-face_1f643.png	just blah	3
18980	32	female	1	2	angry-face_1f620.png	angry	2
18980	32	female	1	2	money-mouth-face_1f911.png	money hungry	5
18980	32	female	1	2	grinning-face_1f600.png	excited	5
18980	32	female	1	2	smiling-face-with-smiling-eyes-and-hand-covering-mouth_1f92d.png	shoulnd t have said anything	3
18980	32	female	1	2	face-with-one-eyebrow-raised_1f928.png	looking at you with a werid facial experssion	3
18980	32	female	1	2	face-with-stuck-out-tongue_1f61b.png	you did something crazy	4
18980	32	female	1	2	ok-hand-sign_1f44c.png	okay	3
18980	32	female	1	2	neutral-face_1f610.png	blah	3
18980	32	female	1	2	two-hearts_1f495.png	love	5
18980	32	female	1	2	kissing-face-with-closed-eyes_1f61a.png	kisses	5
18980	32	female	1	2	tired-face_1f62b.png	i m going to cry look	2
18980	32	female	1	2	dizzy-face_1f635.png	what happened now	3
18980	32	female	1	2	grinning-face-with-one-large-and-one-small-eye_1f92a.png	being goofy	3
18980	32	female	1	2	kissing-face-with-smiling-eyes_1f619.png	kisses	5
18980	32	female	1	2	face-with-rolling-eyes_1f644.png	duh	3
18980	32	female	1	2	zipper-mouth-face_1f910.png	keeping your mouth shut	3
18980	32	female	1	2	face-with-finger-covering-closed-lips_1f92b.png	being quiet	3
18980	32	female	1	2	smiling-face-with-halo_1f607.png	your an angel	5
18980	32	female	1	2	pensive-face_1f614.png	your sad	1
18980	32	female	1	2	face-savouring-delicious-food_1f60b.png	something looks delicous	5
18980	32	female	1	2	confounded-face_1f616.png	something looks gross	3
18980	32	female	1	2	smiling-face-with-open-mouth_1f603.png	excited	5
18980	32	female	1	2	kissing-face_1f617.png	kisses	5
18980	32	female	1	2	hugging-face_1f917.png	hug	5
18980	32	female	1	2	nerd-face_1f913.png	goofy	4
18980	32	female	1	2	yawning-face_1f971.png	tired	3
18980	32	female	1	2	imp_1f47f.png	devil	3
18980	32	female	1	2	grinning-face-with-star-eyes_1f929.png	excited	2
18980	32	female	1	2	victory-hand_270c.png	peace	3
18980	32	female	1	2	face-with-look-of-triumph_1f624.png	blowing smoke out your nose	3
18980	32	female	1	2	crying-face_1f622.png	starting to cry	2
18980	32	female	1	2	nauseated-face_1f922.png	going to puke	2
18980	32	female	1	2	loudly-crying-face_1f62d.png	blawing your eyes out	2
18980	32	female	1	2	face-throwing-a-kiss_1f618.png	kissed with love	5
18980	32	female	1	2	grimacing-face_1f62c.png	just happy	5
18980	32	female	1	2	thumbs-up-sign_emoji-modifier-fitzpatrick-type-3_1f44d-1f3fc_1f3fc.png	thumbs up good job	4
18980	32	female	1	2	slightly-frowning-face_1f641.png	unsure	3
18980	32	female	1	2	face-with-stuck-out-tongue-and-tightly-closed-eyes_1f61d (1).png	crazy	3
18980	32	female	1	2	smiling-face-with-heart-shaped-eyes_1f60d.png	you love something or someone	5
18980	32	female	1	2	heavy-black-heart_2764.png	love	5
18980	32	female	1	2	face-screaming-in-fear_1f631.png	uh oh wow	1
18980	32	female	1	2	face-with-open-mouth_1f62e.png	oh	3
18980	32	female	1	2	thinking-face_1f914.png	thinking	3
18980	32	female	1	2	pouting-face_1f621.png	angry	1
18980	32	female	1	2	smiling-face-with-sunglasses_1f60e.png	cool	3
18980	32	female	1	2	thumbs-down-sign_emoji-modifier-fitzpatrick-type-5_1f44e-1f3fe_1f3fe.png	not so good	2
18980	32	female	1	2	fearful-face_1f628.png	something isn t good	2
18980	32	female	1	2	pile-of-poo_1f4a9.png	chocolate ice cream or poop	3
18980	32	female	1	2	confused-face_1f615.png	meh	3
18980	32	female	1	2	rolling-on-the-floor-laughing_1f923.png	laughing crying	5
18980	32	female	1	2	smiling-face-with-smiling-eyes_1f60a.png	happy	5
18980	32	female	1	2	face-with-open-mouth-vomiting_1f92e.png	puking	1
18980	32	female	1	2	face-with-cowboy-hat_1f920.png	cowboy happy	5
18980	32	female	1	2	face-with-head-bandage_1f915.png	head injury	1
18980	32	female	1	2	expressionless-face_1f611.png	meh	1
18980	32	female	1	2	smiling-face-with-smiling-eyes-and-three-hearts_1f970.png	loved	5
18980	32	female	1	2	unamused-face_1f612.png	uh	2
18980	32	female	1	2	persevering-face_1f623.png	oh no	1
18980	32	female	1	2	white-frowning-face_2639.png	SAD	1
18980	32	female	1	2	grinning-face-with-smiling-eyes_1f601.png	SUPER EXCITED	1
18980	32	female	1	2	winking-face_1f609.png	WINKING ONE EYE	3
18980	32	female	1	2	smiling-face-with-smiling-eyes_1f60a.png	HAPPY	3
18980	32	female	1	2	anguished-face_1f627.png	UH OH	3
18980	32	female	1	2	sleeping-face_1f634.png	SLEEPING	3
18980	32	female	1	2	face-with-stuck-out-tongue-and-tightly-closed-eyes_1f61d.png	XRAZY	4
18980	32	female	1	2	face-with-tears-of-joy_1f602.png	LAUGHING SO HARD YOUR CRYING	5
18980	32	female	1	2	face-with-uneven-eyes-and-wavy-mouth_1f974.png	UNSURE	3
18980	32	female	1	2	freezing-face_1f976.png	FREEZING COLD	1
18980	32	female	1	2	drooling-face_1f924.png	DROOLING OVER SOMETHING GOOD	5
18980	32	female	1	2	smiling-face-with-halo_1f607.png	ANGEL	5
18980	32	female	1	2	smiling-face-with-open-mouth-and-tightly-closed-eyes_1f606.png	CRAZY	5
18980	32	female	1	2	ghost_1f47b.png	GHAST	3
18980	32	female	1	2	face-with-party-horn-and-party-hat_1f973.png	HAPPY BIRTHDAY	5
18980	32	female	1	2	astonished-face_1f632.png	WOW	4
18980	32	female	1	2	sneezing-face_1f927.png	BLOWING YOUR NOSE	2
18980	32	female	1	2	flushed-face_1f633.png	SERIOUS TROUBLE	2
18980	32	female	1	2	flexed-biceps_1f4aa.png	STRONG	3
18980	32	female	1	2	smiling-face-with-open-mouth-and-cold-sweat_1f605.png	LAUGHING WITH SWEAT	3
18980	32	female	1	2	weary-face_1f629.png	UPSET	2
18980	32	female	1	2	smiling-face-with-open-mouth-and-smiling-eyes_1f604.png	HAPPY	5
19483	19	male	1	2	sleepy-face_1f62a.png	exhausted	4
19483	19	male	1	2	face-with-open-mouth-and-cold-sweat_1f630.png	sweating	4
19483	19	male	1	2	smiling-face-with-smiling-eyes-and-three-hearts_1f970.png	loved	5
19483	19	male	1	2	face-with-cold-sweat_1f613.png	tired	5
19483	19	male	1	2	smiling-face-with-halo_1f607.png	innocent	5
19483	19	male	1	2	face-with-stuck-out-tongue_1f61b.png	kidding	4
19483	19	male	1	2	worried-face_1f61f.png	bummed	4
19483	19	male	1	2	angry-face_1f620.png	upset	5
19483	19	male	1	2	face-with-open-mouth_1f62e.png	shocked	4
19483	19	male	1	2	face-with-rolling-eyes_1f644.png	annoyed	4
19483	19	male	1	2	left-facing-fist_1f91b.png	punch	3
19483	19	male	1	2	smiling-face-with-open-mouth_1f603.png	happy	5
19483	19	male	1	2	neutral-face_1f610.png	dumbfounded	4
19483	19	male	1	2	face-savouring-delicious-food_1f60b.png	being silly	4
19483	19	male	1	2	money-mouth-face_1f911.png	want cash	3
19483	19	male	1	2	pensive-face_1f614.png	sad	5
19483	19	male	1	2	face-with-finger-covering-closed-lips_1f92b.png	be quiet	5
19483	19	male	1	2	unamused-face_1f612.png	irritated	5
19483	19	male	1	2	smiling-face-with-smiling-eyes_1f60a.png	sat isfied	4
19483	19	male	1	2	heavy-black-heart_2764.png	heart	5
19483	19	male	1	2	pouting-face_1f621.png	infuriated	5
19483	19	male	1	2	smiling-face-with-open-mouth-and-smiling-eyes_1f604.png	joyous	5
19483	19	male	1	2	kissing-face-with-closed-eyes_1f61a.png	kiss	5
19483	19	male	1	2	ok-hand-sign_1f44c.png	perfect	4
19483	19	male	1	2	ghost_1f47b.png	ghost	4
19483	19	male	1	2	serious-face-with-symbols-covering-mouth_1f92c.png	extremely angry	1
19483	19	male	1	2	face-with-open-mouth-vomiting_1f92e.png	vomit	2
19483	19	male	1	2	thinking-face_1f914.png	thinking	3
19483	19	male	1	2	loudly-crying-face_1f62d.png	crying	2
19483	19	male	1	2	confounded-face_1f616.png	frustated	1
19483	19	male	1	2	upside-down-face_1f643.png	sarcastic smile	2
19483	19	male	1	2	drooling-face_1f924.png	hungry	4
19483	19	male	1	2	thumbs-down-sign_emoji-modifier-fitzpatrick-type-5_1f44e-1f3fe_1f3fe.png	not liking	3
19483	19	male	1	2	face-screaming-in-fear_1f631.png	awestruck	3
19483	19	male	1	2	nerd-face_1f913.png	nerd	2
19483	19	male	1	2	disappointed-but-relieved-face_1f625.png	sorry	2
19483	19	male	1	2	grinning-face-with-one-large-and-one-small-eye_1f92a.png	crazy	2
19483	19	male	1	2	frowning-face-with-open-mouth_1f626.png	surprised	4
19483	19	male	1	2	kissing-face_1f617.png	apologetic kiss	4
19483	19	male	1	2	face-with-open-mouth-vomiting_1f92e (1).png	disgusted	1
19483	19	male	1	2	smiling-face-with-open-mouth-and-tightly-closed-eyes_1f606.png	laughing	5
19483	19	male	1	2	smiling-face-with-smiling-eyes-and-hand-covering-mouth_1f92d.png	shy	4
19483	19	male	1	2	face-with-pleading-eyes_1f97a.png	want something	3
19483	19	male	1	2	flushed-face_1f633.png	surprised	4
19483	19	male	1	2	anguished-face_1f627.png	woah	4
19483	19	male	1	2	face-with-head-bandage_1f915.png	injured	2
19483	19	male	1	2	face-with-stuck-out-tongue-and-tightly-closed-eyes_1f61d.png	sarcastically silly	4
19483	19	male	1	2	relieved-face_1f60c.png	relieved	5
19483	19	male	1	2	smiling-face-with-smiling-eyes_1f60a.png	content	4
19483	19	male	1	2	rolling-on-the-floor-laughing_1f923.png	laughing hysterically	5
19483	19	male	1	2	overheated-face_1f975.png	feeling hot	2
19483	19	male	1	2	speech-balloon_1f4ac.png	typing	3
19483	19	male	1	2	face-without-mouth_1f636.png	speechless	3
19483	19	male	1	2	grimacing-face_1f62c.png	gulity	2
19483	19	male	1	2	victory-hand_270c.png	peace	5
19483	19	male	1	2	smiling-face-with-heart-shaped-eyes_1f60d.png	showing others love	5
19483	19	male	1	2	smiling-face-with-smiling-eyes-and-three-hearts_1f970.png	feeling loved	5
19483	19	male	1	2	face-with-tears-of-joy_1f602.png	Laughing hard	5
19483	19	male	1	2	smiling-face-with-open-mouth-and-cold-sweat_1f605.png	realizing	2
19483	19	male	1	2	expressionless-face_1f611.png	annoyed	2
19483	19	male	1	2	thumbs-up-sign_emoji-modifier-fitzpatrick-type-3_1f44d-1f3fc_1f3fc.png	nice	4
19483	19	male	1	2	person-with-folded-hands_1f64f.png	hi five	4
19483	19	male	1	2	white-frowning-face_2639.png	sad	1
19483	19	male	1	2	face-with-look-of-triumph_1f624.png	fed up	1
19483	19	male	1	2	face-throwing-a-kiss_1f618.png	love kiss	5
19483	19	male	1	2	hushed-face_1f62f.png	amazed	5
19483	19	male	1	2	smiling-face-with-sunglasses_1f60e.png	cool	5
19483	19	male	1	2	clown-face_1f921.png	clown	2
19483	19	male	1	2	persevering-face_1f623.png	very guilty	2
19483	19	male	1	2	white-smiling-face_263a.png	excited	5
19483	19	male	1	2	face-with-party-horn-and-party-hat_1f973.png	celebration	4
19483	19	male	1	2	tired-face_1f62b.png	very sad	1
19483	19	male	1	2	slightly-frowning-face_1f641.png	dissapointed	2
19483	19	male	1	2	yawning-face_1f971.png	bored	2
19483	19	male	1	2	crying-face_1f622.png	sympathetic	2
19483	19	male	1	2	two-hearts_1f495.png	love	4
19483	19	male	1	2	grinning-face-with-star-eyes_1f929.png	popular	4
19483	19	male	1	2	nauseated-face_1f922.png	disgusted	1
19483	19	male	1	2	grinning-face-with-smiling-eyes_1f601.png	smiling	4
19483	19	male	1	2	face-with-uneven-eyes-and-wavy-mouth_1f974.png	drunk	2
19483	19	male	1	2	sneezing-face_1f927.png	nasty	2
19483	19	male	1	2	sleeping-face_1f634.png	sleepy	3
19483	19	male	1	2	shocked-face-with-exploding-head_1f92f.png	extremely amazed	4
19483	19	male	1	2	kissing-face-with-smiling-eyes_1f619.png	kiss	4
19483	19	male	1	2	confused-face_1f615.png	confused	3
19483	19	male	1	2	astonished-face_1f632.png	gasp	2
19483	19	male	1	2	hugging-face_1f917.png	hug	4
19483	19	male	1	2	person-raising-both-hands-in-celebration_1f64c.png	agree	4
19483	19	male	1	2	face-with-monocle_1f9d0.png	suspect	2
19483	19	male	1	2	face-with-stuck-out-tongue-and-tightly-closed-eyes_1f61d (1).png	sarcastically silly	4
19483	19	male	1	2	freezing-face_1f976.png	feeling cold	3
19483	19	male	1	2	lying-face_1f925.png	lying	2
19483	19	male	1	2	face-with-thermometer_1f912.png	sick	2
19483	19	male	1	2	zipper-mouth-face_1f910.png	not speaking	3
19483	19	male	1	2	weary-face_1f629.png	extremely bummed out	2
19483	19	male	1	2	disappointed-face_1f61e.png	sad	2
19483	19	male	1	2	fearful-face_1f628.png	fearfully surprised	1
19483	19	male	1	2	face-with-one-eyebrow-raised_1f928.png	suspicious	2
19483	19	male	1	2	face-with-cowboy-hat_1f920.png	cowboy	3
19483	19	male	1	2	pile-of-poo_1f4a9.png	poop	2
19483	19	male	1	2	smiling-face-with-halo_1f607.png	innocent	5
19483	19	male	1	2	grinning-face_1f600.png	Happy	5
19483	19	male	1	2	slightly-smiling-face_1f642.png	Mad	1
19483	19	male	1	2	dizzy-face_1f635.png	fatal surprised	2
19483	19	male	1	2	flexed-biceps_1f4aa.png	strong	4
19483	19	male	1	2	winking-face_1f609.png	flirt	4
19483	19	male	1	2	smirking-face_1f60f.png	not amused	3
19483	19	male	1	2	imp_1f47f.png	evil	2
21903	22	male	1	1	smiling-face-with-sunglasses_1f60e.png	S unglasses	5
21903	22	male	1	1	pile-of-poo_1f4a9.png	poop	1
21903	22	male	1	1	clown-face_1f921.png	clown	5
21903	22	male	1	1	nauseated-face_1f922.png		2
21903	22	male	1	1	ok-hand-sign_1f44c.png	okay	4
21903	22	male	1	1	heavy-black-heart_2764.png	heart	5
21903	22	male	1	1	relieved-face_1f60c.png	calm	3
21903	22	male	1	1	face-with-stuck-out-tongue_1f61b.png	tongue out	3
21903	22	male	1	1	thinking-face_1f914.png	thinking	5
21903	22	male	1	1	two-hearts_1f495.png	double hearts	5
21903	22	male	1	1	crying-face_1f622.png	tear	3
21903	22	male	1	1	pensive-face_1f614.png	pensive	5
21903	22	male	1	1	face-savouring-delicious-food_1f60b.png	smiling with tongue out	3
21903	22	male	1	1	smiling-face-with-smiling-eyes_1f60a.png	pleasant	3
21903	22	male	1	1	face-with-thermometer_1f912.png	sick	3
21903	22	male	1	1	face-screaming-in-fear_1f631.png	fear	4
21903	22	male	1	1	overheated-face_1f975.png	hot	2
21903	22	male	1	1	hushed-face_1f62f.png	suprised	4
21903	22	male	1	1	face-with-stuck-out-tongue-and-tightly-closed-eyes_1f61d.png		3
21903	22	male	1	1	angry-face_1f620.png	angry	3
21903	22	male	1	1	face-with-one-eyebrow-raised_1f928.png	dubious	3
21903	22	male	1	1	slightly-smiling-face_1f642.png	generic	2
21903	22	male	1	1	speech-balloon_1f4ac.png	thinking	3
21903	22	male	1	1	frowning-face-with-open-mouth_1f626.png	wow	3
21903	22	male	1	1	face-with-open-mouth-vomiting_1f92e.png	puke	1
21903	22	male	1	1	upside-down-face_1f643.png	upsidedown	3
21903	22	male	1	1	yawning-face_1f971.png	yawn	3
21903	22	male	1	1	smiling-face-with-halo_1f607.png	angelic	3
21903	22	male	1	1	face-throwing-a-kiss_1f618.png	flirty	4
21903	22	male	1	1	kissing-face-with-smiling-eyes_1f619.png	whistle	3
21903	22	male	1	1	hugging-face_1f917.png	pleasant 2	2
21903	22	male	1	1	sleepy-face_1f62a.png	sleepy	3
21903	22	male	1	1	person-with-folded-hands_1f64f.png	pray	1
21903	22	male	1	1	grimacing-face_1f62c.png	e	3
21903	22	male	1	1	grinning-face-with-star-eyes_1f929.png	starstruck	3
21903	22	male	1	1	disappointed-face_1f61e.png	not so great	3
21903	22	male	1	1	flexed-biceps_1f4aa.png	muscle	3
21903	22	male	1	1	white-smiling-face_263a.png	pleasant again	3
21903	22	male	1	1	confounded-face_1f616.png	eh	3
21903	22	male	1	1	kissing-face-with-closed-eyes_1f61a.png	whistle 2	3
21903	22	male	1	1	face-with-party-horn-and-party-hat_1f973.png	party	5
21903	22	male	1	1	smiling-face-with-smiling-eyes-and-hand-covering-mouth_1f92d.png	shock	3
21903	22	male	1	1	person-raising-both-hands-in-celebration_1f64c.png	arms up	3
21903	22	male	1	1	grinning-face_1f600.png	smile	3
21903	22	male	1	1	face-with-rolling-eyes_1f644.png	eyeroll	5
21903	22	male	1	1	confused-face_1f615.png	average	3
21903	22	male	1	1	smirking-face_1f60f.png	smirk	5
21903	22	male	1	1	smiling-face-with-smiling-eyes-and-three-hearts_1f970.png	smile hearts	3
21903	22	male	1	1	persevering-face_1f623.png	worried	3
21903	22	male	1	1	face-with-open-mouth_1f62e.png	surprise	3
21903	22	male	1	1	sleeping-face_1f634.png	sleeping	4
21903	22	male	1	1	zipper-mouth-face_1f910.png	zipper	4
21903	22	male	1	1	face-without-mouth_1f636.png	no mouth	1
21903	22	male	1	1	serious-face-with-symbols-covering-mouth_1f92c.png	swearing	3
21903	22	male	1	1	shocked-face-with-exploding-head_1f92f.png	mind blown	2
21903	22	male	1	1	white-frowning-face_2639.png	frown	4
21903	22	male	1	1	face-with-uneven-eyes-and-wavy-mouth_1f974.png	funny face	1
21903	22	male	1	1	loudly-crying-face_1f62d.png	crying	4
21903	22	male	1	1	freezing-face_1f976.png	cold	3
21903	22	male	1	1	money-mouth-face_1f911.png	money3	2
21903	22	male	1	1	face-with-open-mouth-and-cold-sweat_1f630.png	worry	3
21903	22	male	1	1	disappointed-but-relieved-face_1f625.png	worry 2	3
21903	22	male	1	1	face-with-cold-sweat_1f613.png	sweatdrop	3
21903	22	male	1	1	thumbs-up-sign_emoji-modifier-fitzpatrick-type-3_1f44d-1f3fc_1f3fc.png	thumbs up	3
21903	22	male	1	1	imp_1f47f.png	angry devil	5
21903	22	male	1	1	weary-face_1f629.png	weary	3
21903	22	male	1	1	face-with-cowboy-hat_1f920.png	cowboy	4
21903	22	male	1	1	smiling-face-with-open-mouth-and-smiling-eyes_1f604.png	smiling	3
21903	22	male	1	1	astonished-face_1f632.png	surprise	3
21903	22	male	1	1	face-with-look-of-triumph_1f624.png	condifent	3
21903	22	male	1	1	nerd-face_1f913.png	nerdy	1
21903	22	male	1	1	flushed-face_1f633.png	blush	5
21903	22	male	1	1	face-with-pleading-eyes_1f97a.png	pleading	5
21903	22	male	1	1	slightly-frowning-face_1f641.png	frown	3
21903	22	male	1	1	expressionless-face_1f611.png	that me	5
21903	22	male	1	1	unamused-face_1f612.png	eyeroll	3
21903	22	male	1	1	face-with-finger-covering-closed-lips_1f92b.png	shhh	5
21903	22	male	1	1	pouting-face_1f621.png	angry	3
21903	22	male	1	1	victory-hand_270c.png	peace	4
21903	22	male	1	1	tired-face_1f62b.png	weary shock	3
21903	22	male	1	1	face-with-stuck-out-tongue-and-tightly-closed-eyes_1f61d (1).png	tongue out	3
21903	22	male	1	1	face-with-head-bandage_1f915.png	hurt	3
21903	22	male	1	1	smiling-face-with-heart-shaped-eyes_1f60d.png	heart eyes	3
21903	22	male	1	1	sneezing-face_1f927.png	blowing nose	2
21903	22	male	1	1	smiling-face-with-smiling-eyes_1f60a.png	smile	3
21903	22	male	1	1	face-with-monocle_1f9d0.png	scholarly	3
21903	22	male	1	1	fearful-face_1f628.png	shock	3
21903	22	male	1	1	neutral-face_1f610.png	neutral	3
21903	22	male	1	1	smiling-face-with-smiling-eyes-and-three-hearts_1f970.png	heart blush	3
21903	22	male	1	1	smiling-face-with-open-mouth-and-tightly-closed-eyes_1f606.png	laughing	3
21903	22	male	1	1	rolling-on-the-floor-laughing_1f923.png	cry laughing	3
21903	22	male	1	1	lying-face_1f925.png	liar	3
21903	22	male	1	1	face-with-tears-of-joy_1f602.png	cry laughing 2	4
21903	22	male	1	1	grinning-face-with-smiling-eyes_1f601.png	smiling	3
21903	22	male	1	1	worried-face_1f61f.png	unpleasant	3
21903	22	male	1	1	drooling-face_1f924.png	drool	3
21903	22	male	1	1	ghost_1f47b.png	ghost	5
21903	22	male	1	1	smiling-face-with-open-mouth_1f603.png	smiling	3
21903	22	male	1	1	face-with-open-mouth-vomiting_1f92e (1).png	puke	1
21903	22	male	1	1	smiling-face-with-halo_1f607.png	angelic	4
21903	22	male	1	1	dizzy-face_1f635.png	x eyes	5
21903	22	male	1	1	winking-face_1f609.png	winking	3
21903	22	male	1	1	grinning-face-with-one-large-and-one-small-eye_1f92a.png	crazy	3
21903	22	male	1	1	thumbs-down-sign_emoji-modifier-fitzpatrick-type-5_1f44e-1f3fe_1f3fe.png	thumbs down	3
21903	22	male	1	1	left-facing-fist_1f91b.png	fist	3
21903	22	male	1	1	kissing-face_1f617.png	whistle	3
21903	22	male	1	1	smiling-face-with-open-mouth-and-cold-sweat_1f605.png	smiling sweatdrop	2
21903	22	male	1	1	anguished-face_1f627.png	shock	3
22818	19	female	2	2	smiling-face-with-open-mouth_1f603.png	Happy	4
22818	19	female	2	2	person-raising-both-hands-in-celebration_1f64c.png	Praise yay	4
22818	19	female	2	2	fearful-face_1f628.png	Realization shock embarrassment	2
22818	19	female	2	2	face-without-mouth_1f636.png	Speechless oop	2
22818	19	female	2	2	overheated-face_1f975.png	Out of breath tired	3
22818	19	female	2	2	left-facing-fist_1f91b.png	Fist bump hell yeah	4
22818	19	female	2	2	relieved-face_1f60c.png	Peaceful smug	4
22818	19	female	2	2	victory-hand_270c.png	Peace	5
22818	19	female	2	2	flexed-biceps_1f4aa.png	Strong	4
22818	19	female	2	2	face-with-stuck-out-tongue-and-tightly-closed-eyes_1f61d.png	Playful	4
22818	19	female	2	2	grinning-face-with-one-large-and-one-small-eye_1f92a.png	Goofy tipsy	4
22818	19	female	2	2	shocked-face-with-exploding-head_1f92f.png	Mindblown burnt out	3
22818	19	female	2	2	disappointed-but-relieved-face_1f625.png	Shame embarassment sad	1
22818	19	female	2	2	money-mouth-face_1f911.png	Money	4
22818	19	female	2	2	kissing-face-with-smiling-eyes_1f619.png	kissy love ya	4
22818	19	female	2	2	sleepy-face_1f62a.png	Snoozing sick	3
22818	19	female	2	2	person-with-folded-hands_1f64f.png	Praise amen	4
22818	19	female	2	2	smiling-face-with-sunglasses_1f60e.png	Cool	4
22818	19	female	2	2	disappointed-face_1f61e.png	Tired	3
22818	19	female	2	2	grimacing-face_1f62c.png	On edge	2
22818	19	female	2	2	unamused-face_1f612.png	Bored annoyed	2
22818	19	female	2	2	persevering-face_1f623.png	Anxious frazzled	2
22818	19	female	2	2	grinning-face_1f600.png	happy	5
22818	19	female	2	2	dizzy-face_1f635.png	i m dead no way	3
22818	19	female	2	2	zipper-mouth-face_1f910.png	I won t say a thing	3
22818	19	female	2	2	face-with-cowboy-hat_1f920.png	Cowboy country boy	4
22818	19	female	2	2	crying-face_1f622.png	sad	2
22818	19	female	2	2	neutral-face_1f610.png	welp	3
22818	19	female	2	2	smiling-face-with-halo_1f607.png	Angelic	4
22818	19	female	2	2	ok-hand-sign_1f44c.png	Nice	4
22818	19	female	2	2	smiling-face-with-open-mouth-and-cold-sweat_1f605.png	whoops	4
22818	19	female	2	2	face-throwing-a-kiss_1f618.png	love you	4
22818	19	female	2	2	clown-face_1f921.png	Clown	2
22818	19	female	2	2	smirking-face_1f60f.png	smug smirk	4
22818	19	female	2	2	smiling-face-with-open-mouth-and-smiling-eyes_1f604.png	laughing	4
22818	19	female	2	2	confounded-face_1f616.png	anxious	3
22818	19	female	2	2	face-with-one-eyebrow-raised_1f928.png	skeptical	3
22818	19	female	2	2	face-screaming-in-fear_1f631.png	shock omg	3
22818	19	female	2	2	face-with-monocle_1f9d0.png	Inquisitive	3
22818	19	female	2	2	serious-face-with-symbols-covering-mouth_1f92c.png	angry cussing	2
22818	19	female	2	2	face-with-tears-of-joy_1f602.png	laughing lol	4
22818	19	female	2	2	smiling-face-with-heart-shaped-eyes_1f60d.png	in love	4
22818	19	female	2	2	smiling-face-with-smiling-eyes-and-three-hearts_1f970.png	enamoured	4
22818	19	female	2	2	pensive-face_1f614.png	disappointed	2
22818	19	female	2	2	nauseated-face_1f922.png	disgusted sick	2
22818	19	female	2	2	thumbs-down-sign_emoji-modifier-fitzpatrick-type-5_1f44e-1f3fe_1f3fe.png	disapprove	2
22818	19	female	2	2	face-with-stuck-out-tongue_1f61b.png	goofy	3
22818	19	female	2	2	sneezing-face_1f927.png	sick moved to tears	3
22818	19	female	2	2	yawning-face_1f971.png	tired	3
22818	19	female	2	2	face-with-open-mouth_1f62e.png	surprised	3
22818	19	female	2	2	hugging-face_1f917.png	jazz hands no problem	3
22818	19	female	2	2	face-with-open-mouth-vomiting_1f92e.png	vomit disgusted	2
22818	19	female	2	2	white-smiling-face_263a.png	happy pleased	4
22818	19	female	2	2	smiling-face-with-halo_1f607.png	angelic	4
22818	19	female	2	2	smiling-face-with-open-mouth-and-tightly-closed-eyes_1f606.png	laughing	4
22818	19	female	2	2	face-with-thermometer_1f912.png	sick	2
22818	19	female	2	2	face-with-pleading-eyes_1f97a.png	please begging pleading	3
22818	19	female	2	2	thinking-face_1f914.png	thoughtful	3
22818	19	female	2	2	kissing-face_1f617.png	welp	3
22818	19	female	2	2	rolling-on-the-floor-laughing_1f923.png	lol	4
22818	19	female	2	2	thumbs-up-sign_emoji-modifier-fitzpatrick-type-3_1f44d-1f3fc_1f3fc.png	approve	4
22818	19	female	2	2	freezing-face_1f976.png	freezing	2
22818	19	female	2	2	ghost_1f47b.png	boo	3
22818	19	female	2	2	drooling-face_1f924.png	drooling i want it	4
22818	19	female	2	2	worried-face_1f61f.png	oh crap	2
22818	19	female	2	2	flushed-face_1f633.png	traumatized	2
22818	19	female	2	2	imp_1f47f.png	angry	1
22818	19	female	2	2	white-frowning-face_2639.png	sad and shocked	2
22818	19	female	2	2	face-with-finger-covering-closed-lips_1f92b.png	keep quiet	3
22818	19	female	2	2	smiling-face-with-smiling-eyes-and-three-hearts_1f970.png	enamoured	4
22818	19	female	2	2	tired-face_1f62b.png	despair	2
22818	19	female	2	2	expressionless-face_1f611.png	not pleased	3
22818	19	female	2	2	grinning-face-with-smiling-eyes_1f601.png	fine	4
22818	19	female	2	2	smiling-face-with-smiling-eyes-and-hand-covering-mouth_1f92d.png	shocked i shouldnt have said that	2
22818	19	female	2	2	loudly-crying-face_1f62d.png	crying	3
22818	19	female	2	2	frowning-face-with-open-mouth_1f626.png	disturbed	2
22818	19	female	2	2	face-with-look-of-triumph_1f624.png	scoff annoyed	2
22818	19	female	2	2	slightly-frowning-face_1f641.png	sad	2
22818	19	female	2	2	hushed-face_1f62f.png	surprised	4
22818	19	female	2	2	winking-face_1f609.png	wink	4
22818	19	female	2	2	anguished-face_1f627.png	shocked	2
22818	19	female	2	2	face-savouring-delicious-food_1f60b.png	yummy	4
22818	19	female	2	2	face-with-uneven-eyes-and-wavy-mouth_1f974.png	drunk	3
22818	19	female	2	2	smiling-face-with-smiling-eyes_1f60a.png	happy	4
22818	19	female	2	2	pouting-face_1f621.png	angry	2
22818	19	female	2	2	face-with-rolling-eyes_1f644.png	disinterested annoyed	2
22818	19	female	2	2	smiling-face-with-smiling-eyes_1f60a.png	happy	4
22818	19	female	2	2	face-with-cold-sweat_1f613.png	scolded	2
22818	19	female	2	2	lying-face_1f925.png	liar	2
22818	19	female	2	2	astonished-face_1f632.png	oh realization	3
22818	19	female	2	2	face-with-open-mouth-vomiting_1f92e (1).png	vomit disgusted	2
22818	19	female	2	2	heavy-black-heart_2764.png	love ya	4
22818	19	female	2	2	slightly-smiling-face_1f642.png	happy	4
22818	19	female	2	2	face-with-open-mouth-and-cold-sweat_1f630.png	panic	2
22818	19	female	2	2	face-with-party-horn-and-party-hat_1f973.png	party	4
22818	19	female	2	2	angry-face_1f620.png	displeased	2
22818	19	female	2	2	pile-of-poo_1f4a9.png	shit	3
22818	19	female	2	2	nerd-face_1f913.png	nerd	3
22818	19	female	2	2	face-with-head-bandage_1f915.png	injured	2
22818	19	female	2	2	grinning-face-with-star-eyes_1f929.png	popular ambitious	4
22818	19	female	2	2	kissing-face-with-closed-eyes_1f61a.png	love ya	4
22818	19	female	2	2	upside-down-face_1f643.png	internally I m panicking but externally I m just barely keeping up the facade of normally f	3
22818	19	female	2	2	confused-face_1f615.png	unhappy	2
22818	19	female	2	2	speech-balloon_1f4ac.png	texting	3
22818	19	female	2	2	two-hearts_1f495.png	love ya	4
22818	19	female	2	2	sleeping-face_1f634.png	sleeping	3
22818	19	female	2	2	face-with-stuck-out-tongue-and-tightly-closed-eyes_1f61d (1).png	joke	4
22818	19	female	2	2	weary-face_1f629.png	despair vent	3
23792	20	female	1	2	face-with-stuck-out-tongue-and-tightly-closed-eyes_1f61d.png	Playfully sticking your tongue out	5
23792	20	female	1	2	face-with-party-horn-and-party-hat_1f973.png	LETS CELEBRATE	5
23792	20	female	1	2	ok-hand-sign_1f44c.png	Okay	3
23792	20	female	1	2	face-with-look-of-triumph_1f624.png	Steaming with anger	1
23792	20	female	1	2	left-facing-fist_1f91b.png	Fist bump	4
23792	20	female	1	2	smiling-face-with-smiling-eyes-and-three-hearts_1f970.png	Admiration	5
23792	20	female	1	2	confused-face_1f615.png	Eh	3
23792	20	female	1	2	face-with-head-bandage_1f915.png	Head hurts	2
23792	20	female	1	2	thinking-face_1f914.png	Really have to think about this	4
23792	20	female	1	2	smiling-face-with-open-mouth-and-smiling-eyes_1f604.png	So happy	5
23792	20	female	1	2	nauseated-face_1f922.png	Vomit	1
23792	20	female	1	2	face-with-open-mouth-vomiting_1f92e.png	Vomitting	1
23792	20	female	1	2	face-with-cold-sweat_1f613.png	Stressed	2
23792	20	female	1	2	persevering-face_1f623.png	Hurting	2
23792	20	female	1	2	smiling-face-with-halo_1f607.png	Angel	4
23792	20	female	1	2	face-savouring-delicious-food_1f60b.png	Hehe	5
23792	20	female	1	2	face-with-pleading-eyes_1f97a.png	Puppy dog eyes begging	3
23792	20	female	1	2	sleepy-face_1f62a.png	Phew	3
23792	20	female	1	2	person-with-folded-hands_1f64f.png	Pray	3
23792	20	female	1	2	sneezing-face_1f927.png	Feeling under the weather	2
23792	20	female	1	2	smirking-face_1f60f.png	Smirk	4
23792	20	female	1	2	kissing-face_1f617.png	Kissy face	4
23792	20	female	1	2	pensive-face_1f614.png	Saddened	2
23792	20	female	1	2	upside-down-face_1f643.png	Fun smiles	5
23792	20	female	1	2	pouting-face_1f621.png	Rage	1
23792	20	female	1	2	astonished-face_1f632.png	W OAH	3
23792	20	female	1	2	expressionless-face_1f611.png	Meh	3
23792	20	female	1	2	winking-face_1f609.png	Winky	4
23792	20	female	1	2	flexed-biceps_1f4aa.png	Muscle	3
23792	20	female	1	2	loudly-crying-face_1f62d.png	Crying	1
23792	20	female	1	2	face-with-open-mouth-vomiting_1f92e (1).png	Vomitting	1
23792	20	female	1	2	face-with-thermometer_1f912.png	Fever	2
23792	20	female	1	2	face-with-open-mouth-and-cold-sweat_1f630.png	Oh no	2
23792	20	female	1	2	drooling-face_1f924.png	Yummy food	4
23792	20	female	1	2	nerd-face_1f913.png	Feeling nerdy	5
23792	20	female	1	2	flushed-face_1f633.png	Whoops	3
23792	20	female	1	2	grinning-face-with-star-eyes_1f929.png	Starstruck	4
23792	20	female	1	2	face-with-stuck-out-tongue-and-tightly-closed-eyes_1f61d (1).png	Friendly sticking out tongue	5
23792	20	female	1	2	grinning-face-with-one-large-and-one-small-eye_1f92a.png	Feeling crazy	4
23792	20	female	1	2	white-frowning-face_2639.png	Bummed	3
23792	20	female	1	2	grinning-face_1f600.png	Happy	4
23792	20	female	1	2	kissing-face-with-smiling-eyes_1f619.png	Kissy	4
23792	20	female	1	2	yawning-face_1f971.png	Tired	3
23792	20	female	1	2	two-hearts_1f495.png	Love	5
23792	20	female	1	2	face-with-open-mouth_1f62e.png	Woah	3
23792	20	female	1	2	angry-face_1f620.png	Angry	2
23792	20	female	1	2	smiling-face-with-sunglasses_1f60e.png	Cool	3
23792	20	female	1	2	money-mouth-face_1f911.png	Money	3
23792	20	female	1	2	face-with-finger-covering-closed-lips_1f92b.png	Quiet	3
23792	20	female	1	2	dizzy-face_1f635.png	Dead from shock	3
23792	20	female	1	2	weary-face_1f629.png	Distressed why	2
23792	20	female	1	2	victory-hand_270c.png	Peace	4
23792	20	female	1	2	face-with-stuck-out-tongue_1f61b.png	Blehhh	4
23792	20	female	1	2	confounded-face_1f616.png	Pain	2
23792	20	female	1	2	disappointed-face_1f61e.png	Sad	2
23792	20	female	1	2	smiling-face-with-smiling-eyes_1f60a.png	Blessed	5
23792	20	female	1	2	face-with-one-eyebrow-raised_1f928.png	Intriguied	3
23792	20	female	1	2	neutral-face_1f610.png	Eh	3
23792	20	female	1	2	face-without-mouth_1f636.png	No comment	3
23792	20	female	1	2	smiling-face-with-open-mouth-and-cold-sweat_1f605.png	Excited nervousness	3
23792	20	female	1	2	slightly-frowning-face_1f641.png	Sad	3
23792	20	female	1	2	white-smiling-face_263a.png	Bashful	4
23792	20	female	1	2	frowning-face-with-open-mouth_1f626.png	When the minions say what	3
23792	20	female	1	2	lying-face_1f925.png	Pinocchio	3
23792	20	female	1	2	relieved-face_1f60c.png	Peaceful	4
23792	20	female	1	2	kissing-face-with-closed-eyes_1f61a.png	Kiss	4
23792	20	female	1	2	face-with-cowboy-hat_1f920.png	Howdy	4
23792	20	female	1	2	shocked-face-with-exploding-head_1f92f.png	Mind Blown	4
23792	20	female	1	2	face-with-uneven-eyes-and-wavy-mouth_1f974.png	Quirky	4
23792	20	female	1	2	imp_1f47f.png	Revengeful	2
23792	20	female	1	2	face-throwing-a-kiss_1f618.png	Loving kisses	5
23792	20	female	1	2	zipper-mouth-face_1f910.png	Not saying anything	3
23792	20	female	1	2	smiling-face-with-open-mouth-and-tightly-closed-eyes_1f606.png	Haha	4
23792	20	female	1	2	speech-balloon_1f4ac.png	Speaking	3
23792	20	female	1	2	hushed-face_1f62f.png	OOO	3
23792	20	female	1	2	face-with-rolling-eyes_1f644.png	Whatever	3
23792	20	female	1	2	anguished-face_1f627.png	Minions saying what	3
23792	20	female	1	2	face-screaming-in-fear_1f631.png	Complete Shock	3
23792	20	female	1	2	slightly-smiling-face_1f642.png	Content	4
23792	20	female	1	2	fearful-face_1f628.png	Nervous	3
23792	20	female	1	2	thumbs-down-sign_emoji-modifier-fitzpatrick-type-5_1f44e-1f3fe_1f3fe.png	Bad	2
23792	20	female	1	2	heavy-black-heart_2764.png	L OVE	5
23792	20	female	1	2	smiling-face-with-smiling-eyes_1f60a.png	Grateful	4
23792	20	female	1	2	grimacing-face_1f62c.png	Cringe	3
23792	20	female	1	2	face-with-monocle_1f9d0.png	Interesting	3
23792	20	female	1	2	smiling-face-with-open-mouth_1f603.png	Happy	4
23792	20	female	1	2	smiling-face-with-halo_1f607.png	Angel	4
23792	20	female	1	2	grinning-face-with-smiling-eyes_1f601.png	Cheesin	5
23792	20	female	1	2	smiling-face-with-smiling-eyes-and-three-hearts_1f970.png	Admiration	4
23792	20	female	1	2	disappointed-but-relieved-face_1f625.png	Pretty nervous	3
23792	20	female	1	2	thumbs-up-sign_emoji-modifier-fitzpatrick-type-3_1f44d-1f3fc_1f3fc.png	Good	4
23792	20	female	1	2	freezing-face_1f976.png	Freezing cold	3
23792	20	female	1	2	overheated-face_1f975.png	Exhausted from heat	3
23792	20	female	1	2	crying-face_1f622.png	Crying	2
23792	20	female	1	2	rolling-on-the-floor-laughing_1f923.png	Laughing so hard	4
23792	20	female	1	2	serious-face-with-symbols-covering-mouth_1f92c.png	Cussing	2
23792	20	female	1	2	ghost_1f47b.png	BOO	4
23792	20	female	1	2	clown-face_1f921.png	Clown	3
23792	20	female	1	2	smiling-face-with-smiling-eyes-and-hand-covering-mouth_1f92d.png	Whoops	3
23792	20	female	1	2	worried-face_1f61f.png	When you are not sure what to do	3
23792	20	female	1	2	hugging-face_1f917.png	Jazz hands	4
23792	20	female	1	2	pile-of-poo_1f4a9.png	Poop	3
23792	20	female	1	2	face-with-tears-of-joy_1f602.png	Laughing hard	4
23792	20	female	1	2	smiling-face-with-heart-shaped-eyes_1f60d.png	Admiration	5
23792	20	female	1	2	tired-face_1f62b.png	WHY	2
23792	20	female	1	2	sleeping-face_1f634.png	Very tired	4
23792	20	female	1	2	unamused-face_1f612.png	Ugh	2
23792	20	female	1	2	person-raising-both-hands-in-celebration_1f64c.png	Raise the roof	3
24109	16	female	1	2	grinning-face-with-one-large-and-one-small-eye_1f92a.png	silly	5
24109	16	female	1	2	smiling-face-with-sunglasses_1f60e.png	cool	5
24109	16	female	1	2	crying-face_1f622.png	sad	4
24109	16	female	1	2	relieved-face_1f60c.png	satisfied	3
24109	16	female	1	2	face-with-pleading-eyes_1f97a.png	pouting or in awe	5
24109	16	female	1	2	persevering-face_1f623.png	mad	3
24109	16	female	1	2	disappointed-but-relieved-face_1f625.png	worried	3
24109	16	female	1	2	two-hearts_1f495.png	love	5
24109	16	female	1	2	astonished-face_1f632.png	shocked	5
24109	16	female	1	2	face-with-rolling-eyes_1f644.png	annoyed	5
24109	16	female	1	2	ok-hand-sign_1f44c.png	okay	5
24109	16	female	1	2	clown-face_1f921.png	clown or silly	5
24109	16	female	1	2	face-with-open-mouth_1f62e.png	shocked	5
24109	16	female	1	2	face-with-head-bandage_1f915.png	mentally hurt	5
24109	16	female	1	2	fearful-face_1f628.png		1
24109	16	female	1	2	smiling-face-with-smiling-eyes-and-three-hearts_1f970.png	loved	5
24109	16	female	1	2	smiling-face-with-smiling-eyes-and-hand-covering-mouth_1f92d.png	didnt mean to spill a secret	5
24109	16	female	1	2	weary-face_1f629.png	sighing	5
24109	16	female	1	2	face-with-stuck-out-tongue_1f61b.png	silly	4
24109	16	female	1	2	confounded-face_1f616.png	mad	3
24109	16	female	1	2	pensive-face_1f614.png	sad	5
24109	16	female	1	2	yawning-face_1f971.png	tired	5
24109	16	female	1	2	money-mouth-face_1f911.png	money mood	5
24109	16	female	1	2	nerd-face_1f913.png	nerd or smarty	5
24109	16	female	1	2	disappointed-face_1f61e.png	sad	5
24109	16	female	1	2	slightly-frowning-face_1f641.png	sad	5
24109	16	female	1	2	hushed-face_1f62f.png	surprised	5
24109	16	female	1	2	frowning-face-with-open-mouth_1f626.png	shocked	5
24109	16	female	1	2	pile-of-poo_1f4a9.png	poop	5
24109	16	female	1	2	freezing-face_1f976.png	cold	5
24109	16	female	1	2	victory-hand_270c.png	peace	5
24109	16	female	1	2	hugging-face_1f917.png	happy	5
24109	16	female	1	2	lying-face_1f925.png	liar	5
24109	16	female	1	2	left-facing-fist_1f91b.png	fist bump	5
24109	16	female	1	2	speech-balloon_1f4ac.png	typing	5
24109	16	female	1	2	unamused-face_1f612.png	annoyed	5
24109	16	female	1	2	face-with-look-of-triumph_1f624.png	furriating	5
24109	16	female	1	2	smiling-face-with-halo_1f607.png	angel or sweet	5
24109	16	female	1	2	face-with-finger-covering-closed-lips_1f92b.png	shhhh	5
24109	16	female	1	2	person-with-folded-hands_1f64f.png	high five or pray	5
24109	16	female	1	2	smiling-face-with-open-mouth_1f603.png	happy	5
24109	16	female	1	2	white-frowning-face_2639.png	sad	5
24109	16	female	1	2	thumbs-up-sign_emoji-modifier-fitzpatrick-type-3_1f44d-1f3fc_1f3fc.png	cool or yes	5
24109	16	female	1	2	smiling-face-with-heart-shaped-eyes_1f60d.png	in love	5
24109	16	female	1	2	expressionless-face_1f611.png	annoyed	5
24109	16	female	1	2	white-smiling-face_263a.png	blushing	5
24109	16	female	1	2	kissing-face_1f617.png	kisses	5
24109	16	female	1	2	confused-face_1f615.png	worried	4
24109	16	female	1	2	heavy-black-heart_2764.png	love	5
24109	16	female	1	2	angry-face_1f620.png	mad	5
24109	16	female	1	2	face-with-monocle_1f9d0.png	skeptical	5
24109	16	female	1	2	sleepy-face_1f62a.png		1
24109	16	female	1	2	grinning-face-with-smiling-eyes_1f601.png	happy	5
24109	16	female	1	2	flexed-biceps_1f4aa.png	strong	5
24109	16	female	1	2	kissing-face-with-smiling-eyes_1f619.png	kisses	5
24109	16	female	1	2	face-with-cold-sweat_1f613.png	sad	4
24109	16	female	1	2	serious-face-with-symbols-covering-mouth_1f92c.png	super mad	5
24109	16	female	1	2	face-screaming-in-fear_1f631.png	shocked	5
24109	16	female	1	2	grinning-face-with-star-eyes_1f929.png	seeing something perfect	5
24109	16	female	1	2	neutral-face_1f610.png	annoyed or mad	4
24109	16	female	1	2	face-with-open-mouth-vomiting_1f92e (1).png	ew	5
24109	16	female	1	2	smiling-face-with-smiling-eyes_1f60a.png	happy	5
24109	16	female	1	2	face-with-open-mouth-and-cold-sweat_1f630.png		1
24109	16	female	1	2	face-with-tears-of-joy_1f602.png	something is funny	5
24109	16	female	1	2	face-with-open-mouth-vomiting_1f92e.png	ew	5
24109	16	female	1	2	smiling-face-with-open-mouth-and-cold-sweat_1f605.png	stressed	5
24109	16	female	1	2	winking-face_1f609.png	winky wink	5
24109	16	female	1	2	pouting-face_1f621.png	mad	5
24109	16	female	1	2	anguished-face_1f627.png	shocked	5
24109	16	female	1	2	face-with-stuck-out-tongue-and-tightly-closed-eyes_1f61d.png	silly	4
24109	16	female	1	2	loudly-crying-face_1f62d.png	sad crying	5
24109	16	female	1	2	drooling-face_1f924.png	drooling	5
24109	16	female	1	2	flushed-face_1f633.png	shocked	5
24109	16	female	1	2	sleeping-face_1f634.png	sleeping	5
24109	16	female	1	2	worried-face_1f61f.png	so sad that it hurts	5
24109	16	female	1	2	face-with-cowboy-hat_1f920.png	cowboy yeehaw	5
24109	16	female	1	2	smiling-face-with-smiling-eyes-and-three-hearts_1f970.png	loved	5
24109	16	female	1	2	grimacing-face_1f62c.png	oops	5
24109	16	female	1	2	zipper-mouth-face_1f910.png	mouth shut	5
24109	16	female	1	2	ghost_1f47b.png	boo	5
24109	16	female	1	2	grinning-face_1f600.png	happy	4
24109	16	female	1	2	smiling-face-with-open-mouth-and-smiling-eyes_1f604.png	happy	5
24109	16	female	1	2	imp_1f47f.png	devil	4
24109	16	female	1	2	upside-down-face_1f643.png	happy but noy too happy	5
24109	16	female	1	2	face-with-thermometer_1f912.png	sick	5
24109	16	female	1	2	kissing-face-with-closed-eyes_1f61a.png	kisses	5
24109	16	female	1	2	face-with-stuck-out-tongue-and-tightly-closed-eyes_1f61d (1).png	silly	5
24109	16	female	1	2	tired-face_1f62b.png		1
24109	16	female	1	2	nauseated-face_1f922.png	so sick	5
24109	16	female	1	2	smiling-face-with-halo_1f607.png	ange or sweet	5
24109	16	female	1	2	face-with-uneven-eyes-and-wavy-mouth_1f974.png	clueless	5
24109	16	female	1	2	face-without-mouth_1f636.png	no words	5
24109	16	female	1	2	face-with-one-eyebrow-raised_1f928.png	skeptical	5
24109	16	female	1	2	slightly-smiling-face_1f642.png	happy	5
24109	16	female	1	2	shocked-face-with-exploding-head_1f92f.png	mind blown	5
24109	16	female	1	2	smiling-face-with-smiling-eyes_1f60a.png	happy	5
24109	16	female	1	2	smirking-face_1f60f.png	freaky	5
24109	16	female	1	2	face-with-party-horn-and-party-hat_1f973.png	partyyy	5
24109	16	female	1	2	face-savouring-delicious-food_1f60b.png	silly	5
24109	16	female	1	2	person-raising-both-hands-in-celebration_1f64c.png	praise	5
24109	16	female	1	2	rolling-on-the-floor-laughing_1f923.png	funny	5
24109	16	female	1	2	sneezing-face_1f927.png	sick	5
24109	16	female	1	2	overheated-face_1f975.png	hot	5
24109	16	female	1	2	smiling-face-with-open-mouth-and-tightly-closed-eyes_1f606.png	happy	5
24109	16	female	1	2	thinking-face_1f914.png	thinking	5
24109	16	female	1	2	thumbs-down-sign_emoji-modifier-fitzpatrick-type-5_1f44e-1f3fe_1f3fe.png	bad or no	5
24109	16	female	1	2	face-throwing-a-kiss_1f618.png	kisses with love	5
24109	16	female	1	2	dizzy-face_1f635.png	dead	5
24200	18	female	1	2	face-with-open-mouth-and-cold-sweat_1f630.png	worried	2
24200	18	female	1	2	grinning-face-with-one-large-and-one-small-eye_1f92a.png	goofy	5
24200	18	female	1	2	white-frowning-face_2639.png		1
24200	18	female	1	2	smiling-face-with-halo_1f607.png	peaceful	4
24200	18	female	1	2	kissing-face-with-smiling-eyes_1f619.png	kisses	4
24200	18	female	1	2	face-with-thermometer_1f912.png	sick	2
24200	18	female	1	2	smiling-face-with-smiling-eyes_1f60a.png	flirty	4
24200	18	female	1	2	serious-face-with-symbols-covering-mouth_1f92c.png	cussing	1
24200	18	female	1	2	unamused-face_1f612.png	annoyed	2
24200	18	female	1	2	kissing-face-with-closed-eyes_1f61a.png	lovey	4
24200	18	female	1	2	pile-of-poo_1f4a9.png	poop	2
24200	18	female	1	2	zipper-mouth-face_1f910.png	secret	2
24200	18	female	1	2	weary-face_1f629.png	are you kidding	2
24200	18	female	1	2	face-with-stuck-out-tongue-and-tightly-closed-eyes_1f61d (1).png	silly	4
24200	18	female	1	2	face-without-mouth_1f636.png	what	3
24200	18	female	1	2	shocked-face-with-exploding-head_1f92f.png	mind blown	4
24200	18	female	1	2	loudly-crying-face_1f62d.png	so sad	1
24200	18	female	1	2	ok-hand-sign_1f44c.png	okay	3
24200	18	female	1	2	slightly-frowning-face_1f641.png	boo	2
24200	18	female	1	2	face-with-stuck-out-tongue-and-tightly-closed-eyes_1f61d.png	hehe	4
24200	18	female	1	2	crying-face_1f622.png	sad	2
24200	18	female	1	2	nerd-face_1f913.png	nerdy	3
24200	18	female	1	2	face-with-party-horn-and-party-hat_1f973.png	party	5
24200	18	female	1	2	confused-face_1f615.png	dang it	2
24200	18	female	1	2	grinning-face-with-smiling-eyes_1f601.png	cheese	5
24200	18	female	1	2	face-with-open-mouth_1f62e.png	uh oh	3
24200	18	female	1	2	thumbs-down-sign_emoji-modifier-fitzpatrick-type-5_1f44e-1f3fe_1f3fe.png	no	1
24200	18	female	1	2	face-throwing-a-kiss_1f618.png	kissy face	5
24200	18	female	1	2	frowning-face-with-open-mouth_1f626.png	are you serious	2
24200	18	female	1	2	face-with-open-mouth-vomiting_1f92e (1).png	EW	1
24200	18	female	1	2	disappointed-face_1f61e.png	boohoo	2
24200	18	female	1	2	tired-face_1f62b.png	UGH	2
24200	18	female	1	2	pouting-face_1f621.png	UGRH IM ANGRY	1
24200	18	female	1	2	relieved-face_1f60c.png	hehe	4
24200	18	female	1	2	hugging-face_1f917.png	YAY	5
24200	18	female	1	2	sneezing-face_1f927.png	icky	1
24200	18	female	1	2	grimacing-face_1f62c.png	worried	2
24200	18	female	1	2	smiling-face-with-open-mouth-and-cold-sweat_1f605.png	uh oh	2
24200	18	female	1	2	worried-face_1f61f.png	yikes	2
24200	18	female	1	2	thinking-face_1f914.png	i wonder	2
24200	18	female	1	2	smiling-face-with-open-mouth-and-tightly-closed-eyes_1f606.png	im excited	4
24200	18	female	1	2	drooling-face_1f924.png	yummy	3
24200	18	female	1	2	ghost_1f47b.png	ghost	3
24200	18	female	1	2	smiling-face-with-smiling-eyes-and-hand-covering-mouth_1f92d.png	i can t believe it	3
24200	18	female	1	2	persevering-face_1f623.png	im sad	2
24200	18	female	1	2	lying-face_1f925.png	liar	1
24200	18	female	1	2	two-hearts_1f495.png	love	5
24200	18	female	1	2	slightly-smiling-face_1f642.png	kinda happy	3
24200	18	female	1	2	nauseated-face_1f922.png	sick to my stomach	1
24200	18	female	1	2	thumbs-up-sign_emoji-modifier-fitzpatrick-type-3_1f44d-1f3fc_1f3fc.png	okay	3
24200	18	female	1	2	white-smiling-face_263a.png	teehee	4
24200	18	female	1	2	pensive-face_1f614.png	depressed	2
24200	18	female	1	2	face-with-one-eyebrow-raised_1f928.png	hmmm thats werid	2
24200	18	female	1	2	smiling-face-with-smiling-eyes_1f60a.png	happy	4
24200	18	female	1	2	smiling-face-with-smiling-eyes-and-three-hearts_1f970.png	flirty	5
24200	18	female	1	2	face-with-look-of-triumph_1f624.png	WHAT	2
24200	18	female	1	2	face-with-cowboy-hat_1f920.png	fowboy	3
24200	18	female	1	2	confounded-face_1f616.png	eek	2
24200	18	female	1	2	person-raising-both-hands-in-celebration_1f64c.png	yes	3
24200	18	female	1	2	sleepy-face_1f62a.png	sad	2
24200	18	female	1	2	yawning-face_1f971.png		2
24200	18	female	1	2	face-screaming-in-fear_1f631.png	SURPRISED	3
24200	18	female	1	2	face-with-open-mouth-vomiting_1f92e.png	sick	1
24200	18	female	1	2	victory-hand_270c.png	peace	4
24200	18	female	1	2	sleeping-face_1f634.png	tired	2
24200	18	female	1	2	face-with-head-bandage_1f915.png	hurt	2
24200	18	female	1	2	imp_1f47f.png	devil	1
24200	18	female	1	2	smiling-face-with-open-mouth_1f603.png	happy	5
24200	18	female	1	2	astonished-face_1f632.png	whatttt	2
24200	18	female	1	2	face-with-finger-covering-closed-lips_1f92b.png	secret	3
24200	18	female	1	2	kissing-face_1f617.png	kisses	3
24200	18	female	1	2	neutral-face_1f610.png	straight faced	3
24200	18	female	1	2	dizzy-face_1f635.png	dead	1
24200	18	female	1	2	smirking-face_1f60f.png	ooooo	4
24200	18	female	1	2	smiling-face-with-heart-shaped-eyes_1f60d.png	cuteeee	4
24200	18	female	1	2	expressionless-face_1f611.png	r u serious	1
24200	18	female	1	2	face-with-uneven-eyes-and-wavy-mouth_1f974.png	yikesssssssssss	2
24200	18	female	1	2	face-with-tears-of-joy_1f602.png	HAHAHAAHAH	5
24200	18	female	1	2	upside-down-face_1f643.png	its okay im okay	2
24200	18	female	1	2	rolling-on-the-floor-laughing_1f923.png		3
24200	18	female	1	2	face-with-monocle_1f9d0.png	i wonder	3
24200	18	female	1	2	fearful-face_1f628.png	confused	2
24200	18	female	1	2	overheated-face_1f975.png	HOT	2
24200	18	female	1	2	hushed-face_1f62f.png	ooooo	3
24200	18	female	1	2	flexed-biceps_1f4aa.png	strong	4
24200	18	female	1	2	left-facing-fist_1f91b.png	punch	3
24200	18	female	1	2	smiling-face-with-open-mouth-and-smiling-eyes_1f604.png	smile	4
24200	18	female	1	2	flushed-face_1f633.png	EEK	2
24200	18	female	1	2	clown-face_1f921.png	Clown	2
24200	18	female	1	2	smiling-face-with-halo_1f607.png	peaceful	4
24200	18	female	1	2	smiling-face-with-smiling-eyes-and-three-hearts_1f970.png	in love	5
24200	18	female	1	2	grinning-face_1f600.png	happy	4
24200	18	female	1	2	smiling-face-with-sunglasses_1f60e.png	cool	4
24200	18	female	1	2	person-with-folded-hands_1f64f.png	prayin	5
24200	18	female	1	2	disappointed-but-relieved-face_1f625.png	sad	2
24200	18	female	1	2	angry-face_1f620.png	angry	1
24200	18	female	1	2	face-with-stuck-out-tongue_1f61b.png	silly	3
24200	18	female	1	2	speech-balloon_1f4ac.png	nervous	2
24200	18	female	1	2	face-with-pleading-eyes_1f97a.png	so cute	5
24200	18	female	1	2	face-savouring-delicious-food_1f60b.png	hehe	4
24200	18	female	1	2	winking-face_1f609.png	flirty	4
24200	18	female	1	2	freezing-face_1f976.png	cold	2
24200	18	female	1	2	face-with-cold-sweat_1f613.png	sad	2
24200	18	female	1	2	face-with-rolling-eyes_1f644.png	whatever	2
24200	18	female	1	2	heavy-black-heart_2764.png	love	5
24200	18	female	1	2	money-mouth-face_1f911.png	moneyyy	4
24200	18	female	1	2	anguished-face_1f627.png	whattt	2
24200	18	female	1	2	grinning-face-with-star-eyes_1f929.png	YESS GIRLL	5
24576	19	male	1	2	smiling-face-with-sunglasses_1f60e.png	Cool guy	4
24576	19	male	1	2	left-facing-fist_1f91b.png	Punch	3
24576	19	male	1	2	thumbs-down-sign_emoji-modifier-fitzpatrick-type-5_1f44e-1f3fe_1f3fe.png	No	2
24576	19	male	1	2	face-with-uneven-eyes-and-wavy-mouth_1f974.png	Tipsy	4
24576	19	male	1	2	grinning-face-with-one-large-and-one-small-eye_1f92a.png	Crazy	4
24576	19	male	1	2	face-with-open-mouth_1f62e.png	Oh	3
24576	19	male	1	2	face-with-party-horn-and-party-hat_1f973.png	Party	4
24576	19	male	1	2	heavy-black-heart_2764.png	Heart	5
24576	19	male	1	2	smiling-face-with-smiling-eyes_1f60a.png	Smile	4
24576	19	male	1	2	nauseated-face_1f922.png	Gonna be sick	2
24576	19	male	1	2	face-without-mouth_1f636.png		3
24576	19	male	1	2	yawning-face_1f971.png	Yawn	3
24576	19	male	1	2	weary-face_1f629.png	Groan	3
24576	19	male	1	2	face-with-monocle_1f9d0.png	Investigative	3
24576	19	male	1	2	angry-face_1f620.png	Angry	2
24576	19	male	1	2	overheated-face_1f975.png	Hot	3
24576	19	male	1	2	flexed-biceps_1f4aa.png	Strong	4
24576	19	male	1	2	money-mouth-face_1f911.png	Money	4
24576	19	male	1	2	serious-face-with-symbols-covering-mouth_1f92c.png	Fuck	3
24576	19	male	1	2	face-with-cold-sweat_1f613.png	Guilty	2
24576	19	male	1	2	grinning-face-with-smiling-eyes_1f601.png	Grin	4
24576	19	male	1	2	kissing-face-with-closed-eyes_1f61a.png	Kissy face	4
24576	19	male	1	2	astonished-face_1f632.png	Oh	3
24576	19	male	1	2	smiling-face-with-smiling-eyes-and-three-hearts_1f970.png	Loved	5
24576	19	male	1	2	grinning-face_1f600.png	Happy	4
24576	19	male	1	2	face-throwing-a-kiss_1f618.png	Blow kiss	5
24576	19	male	1	2	sneezing-face_1f927.png	Blow nose	3
24576	19	male	1	2	flushed-face_1f633.png	Oh my	3
24576	19	male	1	2	slightly-frowning-face_1f641.png	Sad	2
24576	19	male	1	2	smiling-face-with-halo_1f607.png	Holy	4
24576	19	male	1	2	zipper-mouth-face_1f910.png	Zip it	3
24576	19	male	1	2	kissing-face-with-smiling-eyes_1f619.png	Kissy face	4
24576	19	male	1	2	smiling-face-with-open-mouth-and-tightly-closed-eyes_1f606.png	Laugh	4
24576	19	male	1	2	pile-of-poo_1f4a9.png	Shit	3
24576	19	male	1	2	white-smiling-face_263a.png	Happy	4
24576	19	male	1	2	rolling-on-the-floor-laughing_1f923.png	LMAO	5
24576	19	male	1	2	smiling-face-with-heart-shaped-eyes_1f60d.png	Love	5
24576	19	male	1	2	victory-hand_270c.png	Peace	4
24576	19	male	1	2	face-with-cowboy-hat_1f920.png	Yee Yee	4
24576	19	male	1	2	smiling-face-with-open-mouth-and-smiling-eyes_1f604.png	Laugh	4
24576	19	male	1	2	face-with-open-mouth-vomiting_1f92e.png	Vomit	2
24576	19	male	1	2	face-with-rolling-eyes_1f644.png	Annoyed	2
24576	19	male	1	2	thumbs-up-sign_emoji-modifier-fitzpatrick-type-3_1f44d-1f3fc_1f3fc.png	Yup	4
24576	19	male	1	2	smiling-face-with-open-mouth_1f603.png	Glad	4
24576	19	male	1	2	persevering-face_1f623.png	Sad	2
24576	19	male	1	2	face-with-stuck-out-tongue_1f61b.png	Silly	4
24576	19	male	1	2	grinning-face-with-star-eyes_1f929.png	Star Struck	4
24576	19	male	1	2	slightly-smiling-face_1f642.png	Happy	4
24576	19	male	1	2	fearful-face_1f628.png	Shocked	3
24576	19	male	1	2	crying-face_1f622.png	Crying	2
24576	19	male	1	2	smiling-face-with-smiling-eyes_1f60a.png	Happy	4
24576	19	male	1	2	white-frowning-face_2639.png	Frown	2
24576	19	male	1	2	hushed-face_1f62f.png	Ooooo	3
24576	19	male	1	2	face-with-stuck-out-tongue-and-tightly-closed-eyes_1f61d (1).png	Silly	4
24576	19	male	1	2	tired-face_1f62b.png	Moan	3
24576	19	male	1	2	shocked-face-with-exploding-head_1f92f.png	Mind Blown	3
24576	19	male	1	2	relieved-face_1f60c.png	At Peace	4
24576	19	male	1	2	worried-face_1f61f.png	Frown	2
24576	19	male	1	2	confounded-face_1f616.png	Sad	2
24576	19	male	1	2	face-with-stuck-out-tongue-and-tightly-closed-eyes_1f61d.png	Silly	4
24576	19	male	1	2	person-with-folded-hands_1f64f.png	Blessed	4
24576	19	male	1	2	smirking-face_1f60f.png	Smirk	4
24576	19	male	1	2	expressionless-face_1f611.png	Really bro	2
24576	19	male	1	2	face-with-pleading-eyes_1f97a.png	Begging	3
24576	19	male	1	2	unamused-face_1f612.png	Bored	2
24576	19	male	1	2	face-with-open-mouth-and-cold-sweat_1f630.png	Worried	2
24576	19	male	1	2	disappointed-but-relieved-face_1f625.png	Sad	2
24576	19	male	1	2	two-hearts_1f495.png	Love	4
24576	19	male	1	2	grimacing-face_1f62c.png	Sheesh	3
24576	19	male	1	2	neutral-face_1f610.png	Neutral	3
24576	19	male	1	2	smiling-face-with-smiling-eyes-and-hand-covering-mouth_1f92d.png	Say nothing	4
24576	19	male	1	2	loudly-crying-face_1f62d.png	Sad	2
24576	19	male	1	2	face-with-tears-of-joy_1f602.png	Lol	4
24576	19	male	1	2	person-raising-both-hands-in-celebration_1f64c.png	Hands	3
24576	19	male	1	2	lying-face_1f925.png	Liar	2
24576	19	male	1	2	thinking-face_1f914.png	Hmmm	3
24576	19	male	1	2	nerd-face_1f913.png	Nerd	4
24576	19	male	1	2	frowning-face-with-open-mouth_1f626.png	Shock	3
24576	19	male	1	2	smiling-face-with-smiling-eyes-and-three-hearts_1f970.png	Loved	4
24576	19	male	1	2	drooling-face_1f924.png	Dumb	3
24576	19	male	1	2	smiling-face-with-open-mouth-and-cold-sweat_1f605.png	Nervous laughter	3
24576	19	male	1	2	face-with-open-mouth-vomiting_1f92e (1).png	Ew	2
24576	19	male	1	2	pouting-face_1f621.png	Angry	2
24576	19	male	1	2	anguished-face_1f627.png	Shock	3
24576	19	male	1	2	speech-balloon_1f4ac.png	Talking	3
24576	19	male	1	2	sleeping-face_1f634.png	Sleeping	3
24576	19	male	1	2	disappointed-face_1f61e.png	Depressed	2
24576	19	male	1	2	freezing-face_1f976.png	Cold	3
24576	19	male	1	2	upside-down-face_1f643.png	Sarcastic Smile	2
24576	19	male	1	2	confused-face_1f615.png	Meh	3
24576	19	male	1	2	sleepy-face_1f62a.png	Sleeping	3
24576	19	male	1	2	face-with-look-of-triumph_1f624.png	Pissed	2
24576	19	male	1	2	smiling-face-with-halo_1f607.png	Holy	4
24576	19	male	1	2	hugging-face_1f917.png	Presenting self	3
24576	19	male	1	2	pensive-face_1f614.png	Depressed	2
24576	19	male	1	2	ok-hand-sign_1f44c.png	Ok	4
24576	19	male	1	2	imp_1f47f.png	Evil	4
24576	19	male	1	2	dizzy-face_1f635.png	Dead	3
24576	19	male	1	2	face-screaming-in-fear_1f631.png	Shock	4
24576	19	male	1	2	face-savouring-delicious-food_1f60b.png	Yummy	4
24576	19	male	1	2	face-with-finger-covering-closed-lips_1f92b.png	S hhhh	3
24576	19	male	1	2	clown-face_1f921.png	Clown	3
24576	19	male	1	2	face-with-head-bandage_1f915.png	Hurt	2
24576	19	male	1	2	winking-face_1f609.png	Wink	4
24576	19	male	1	2	ghost_1f47b.png	Boo	3
24576	19	male	1	2	kissing-face_1f617.png	Kissy face	3
24576	19	male	1	2	face-with-thermometer_1f912.png	Sick	2
24576	19	male	1	2	face-with-one-eyebrow-raised_1f928.png	What the hell did you just say	3
26450	18	female	2	2	left-facing-fist_1f91b.png	fistbump	3
26450	18	female	2	2	heavy-black-heart_2764.png	heart	4
26450	18	female	2	2	yawning-face_1f971.png	tired	2
26450	18	female	2	2	relieved-face_1f60c.png	content	4
26450	18	female	2	2	money-mouth-face_1f911.png	money	4
26450	18	female	2	2	face-with-look-of-triumph_1f624.png	humph	2
26450	18	female	2	2	face-with-pleading-eyes_1f97a.png	pwease	2
26450	18	female	2	2	worried-face_1f61f.png	frown	2
26450	18	female	2	2	flexed-biceps_1f4aa.png	strong	3
26450	18	female	2	2	face-screaming-in-fear_1f631.png	ghasp	3
26450	18	female	2	2	face-with-stuck-out-tongue-and-tightly-closed-eyes_1f61d (1).png	blegh	4
26450	18	female	2	2	thumbs-up-sign_emoji-modifier-fitzpatrick-type-3_1f44d-1f3fc_1f3fc.png	thumbs up	4
26450	18	female	2	2	face-with-cowboy-hat_1f920.png	cowboy	4
26450	18	female	2	2	drooling-face_1f924.png	drooly	5
26450	18	female	2	2	lying-face_1f925.png	pinochio	3
26450	18	female	2	2	face-throwing-a-kiss_1f618.png	kisses	5
26450	18	female	2	2	pouting-face_1f621.png	angry	1
26450	18	female	2	2	slightly-frowning-face_1f641.png	frownie	2
26450	18	female	2	2	pensive-face_1f614.png	sad	2
26450	18	female	2	2	face-savouring-delicious-food_1f60b.png	silly	4
26450	18	female	2	2	rolling-on-the-floor-laughing_1f923.png	laughing	5
26450	18	female	2	2	flushed-face_1f633.png	surprise	3
26450	18	female	2	2	person-with-folded-hands_1f64f.png	prayers	3
26450	18	female	2	2	smiling-face-with-halo_1f607.png	halo	4
26450	18	female	2	2	smiling-face-with-halo_1f607.png	halo	4
26450	18	female	2	2	unamused-face_1f612.png	meh	3
26450	18	female	2	2	smiling-face-with-smiling-eyes-and-three-hearts_1f970.png	loves	4
26450	18	female	2	2	face-with-open-mouth_1f62e.png	oo	3
26450	18	female	2	2	kissing-face_1f617.png	smooch	3
26450	18	female	2	2	smirking-face_1f60f.png	heh heh	4
26450	18	female	2	2	face-with-monocle_1f9d0.png	ponder	3
26450	18	female	2	2	smiling-face-with-smiling-eyes_1f60a.png	blush	4
26450	18	female	2	2	confounded-face_1f616.png	grump	2
26450	18	female	2	2	ok-hand-sign_1f44c.png	okay	4
26450	18	female	2	2	face-with-tears-of-joy_1f602.png	laughing	5
26450	18	female	2	2	face-with-one-eyebrow-raised_1f928.png	inquisitive	3
26450	18	female	2	2	slightly-smiling-face_1f642.png	smile	3
26450	18	female	2	2	white-smiling-face_263a.png	happy	4
26450	18	female	2	2	face-with-stuck-out-tongue_1f61b.png	tongue	3
26450	18	female	2	2	smiling-face-with-open-mouth-and-tightly-closed-eyes_1f606.png	happy	4
26450	18	female	2	2	tired-face_1f62b.png	moan	5
26450	18	female	2	2	face-without-mouth_1f636.png		3
26450	18	female	2	2	sleeping-face_1f634.png	sleep	3
26450	18	female	2	2	persevering-face_1f623.png	frown	2
26450	18	female	2	2	nauseated-face_1f922.png	bleh	1
26450	18	female	2	2	grinning-face-with-one-large-and-one-small-eye_1f92a.png	silly	4
26450	18	female	2	2	face-with-rolling-eyes_1f644.png	eye roll	3
26450	18	female	2	2	face-with-cold-sweat_1f613.png	sad	2
26450	18	female	2	2	thinking-face_1f914.png	thinking	3
26450	18	female	2	2	confused-face_1f615.png	meh	3
26450	18	female	2	2	imp_1f47f.png	devil	2
26450	18	female	2	2	sleepy-face_1f62a.png	sleeping	3
26450	18	female	2	2	face-with-thermometer_1f912.png	sick	3
26450	18	female	2	2	clown-face_1f921.png	clown	3
26450	18	female	2	2	angry-face_1f620.png	angry	2
[truncated: 12,149 more rows]
